# Supplementary material for: Single nucleus RNA-sequencing defines unexpected diversity of cholinergic neuron types in the adult mouse spinal cord
Source: PubMed Central journal article supplement (PMC8087807; doi:10.1038/s41467-021-22691-2), 2021-04-30
Supplement: 41467_2021_22691_MOESM1_ESM.pdf [file 41467_2021_22691_MOESM1_ESM.pdf]

# Supplementary Figure 1

## Wild-Type Control

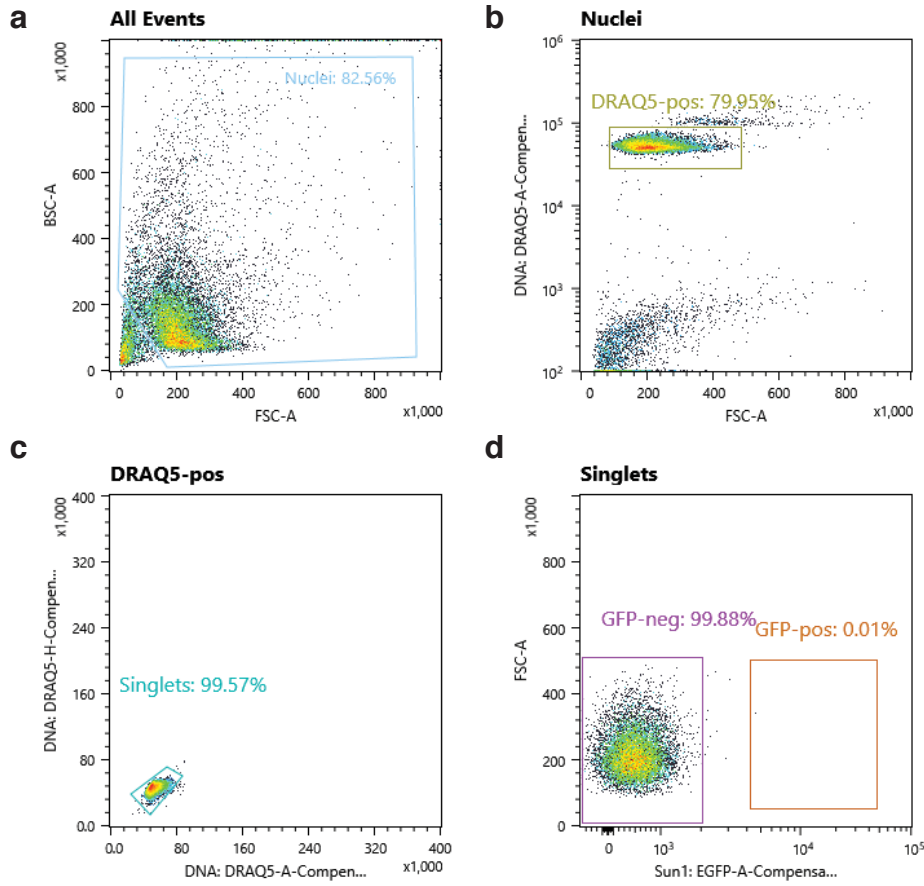

### e Gates and Statistics

| Name       | Events | %Parent | %Total  |
|------------|--------|---------|---------|
| All Events | 15,517 | 0.00%   | 100.00% |
| Nuclei     | 12,811 | 82.56%  | 82.56%  |
| DRAQ5-pos  | 10,242 | 79.95%  | 66.01%  |
| Singlets   | 10,198 | 99.57%  | 65.72%  |
| GFP-neg    | 10,186 | 99.88%  | 65.64%  |
| GFP-pos    | 1      | 0.01%   | 0.01%   |

## Chat<sup>IRE5-Cre/wt</sup> x ROSA-Sun1sfGFP<sup>+wt</sup>

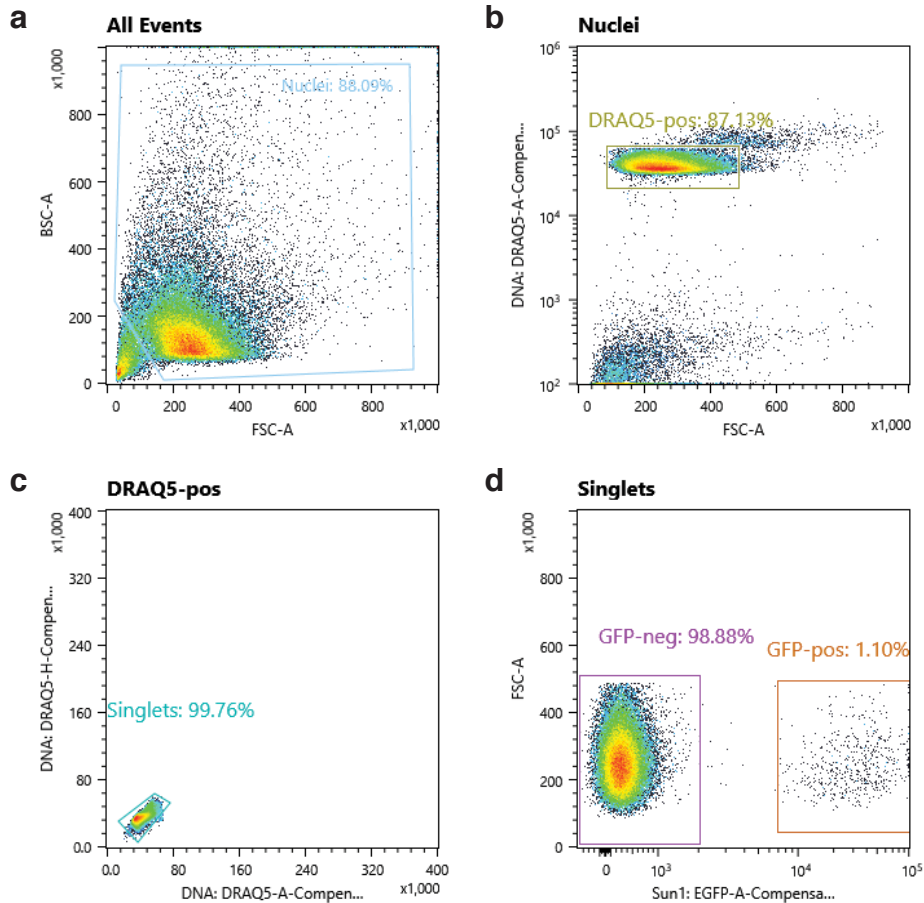

### e Gates and Statistics

| Name       | Events | %Parent | %Total  |
|------------|--------|---------|---------|
| All Events | 65,304 | 0.00%   | 100.00% |
| Nuclei     | 57,524 | 88.09%  | 88.09%  |
| DRAQ5-pos  | 50,119 | 87.13%  | 76.75%  |
| Singlets   | 50,000 | 99.76%  | 76.56%  |
| GFP-neg    | 49,440 | 98.88%  | 75.71%  |
| GFP-pos    | 548    | 1.10%   | 0.84%   |

**Supplementary Fig. 1. Quality control for selection of single GFP-positive nuclei by FACS sorting.**

Example FACS sorting summary from nuclear suspensions prepared from a wild type control sample (top), and a Chat-IRES-Cre::CAG-Sun1sfGFP sample (bottom). **a**, Nuclear suspension visualized by FACS, with removal of small debris via FSC vs BSC gate; **b**, selection of nuclei using DRAQ5 positive gate; **c**, removal of doublets using DRAQ5 height vs. area gate; **d**, collection of GFP+ nuclei; **e**, gating work flow and quantification of events in each gate, from All Events → Nuclei → Draq5-Pos → Singlets → GFP +/-.

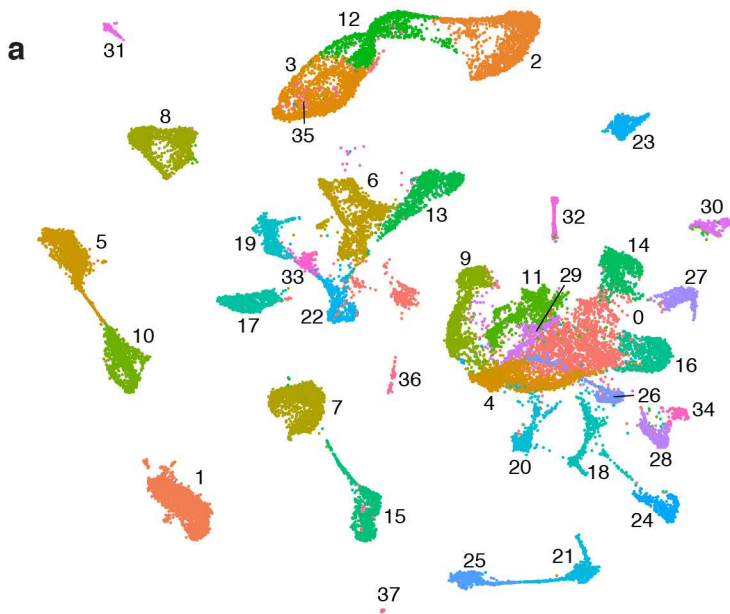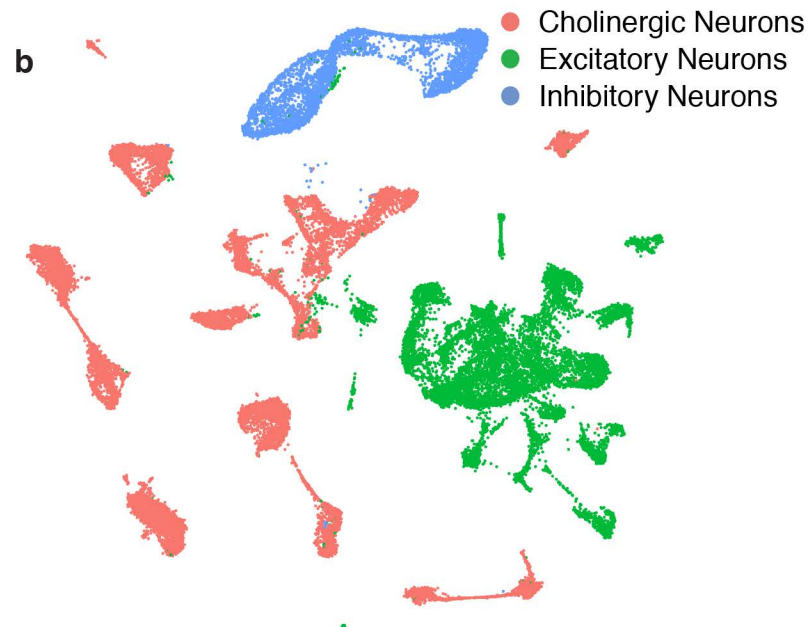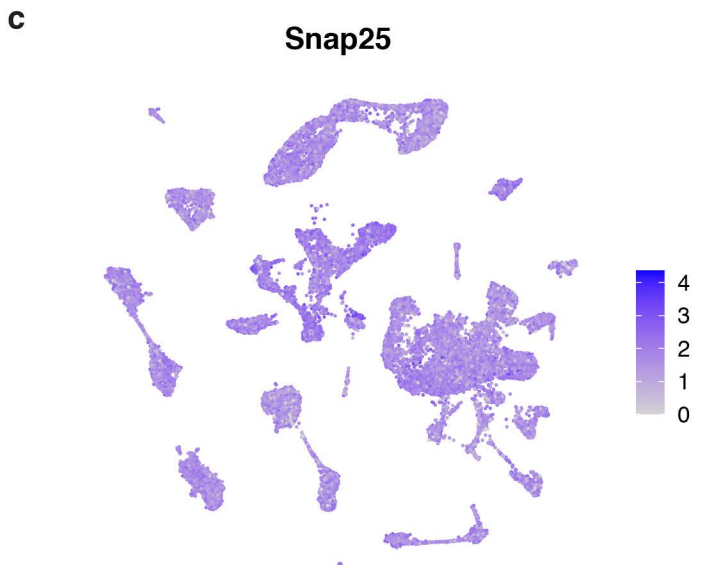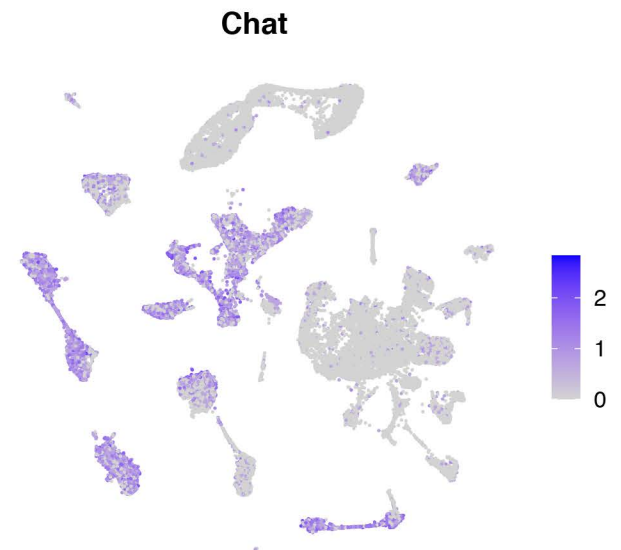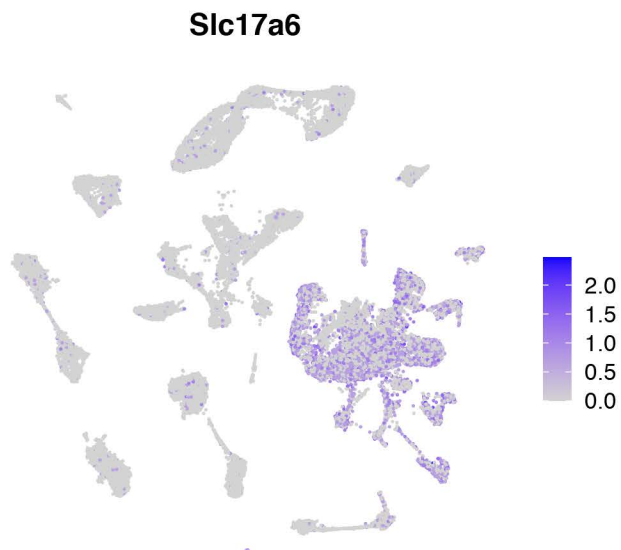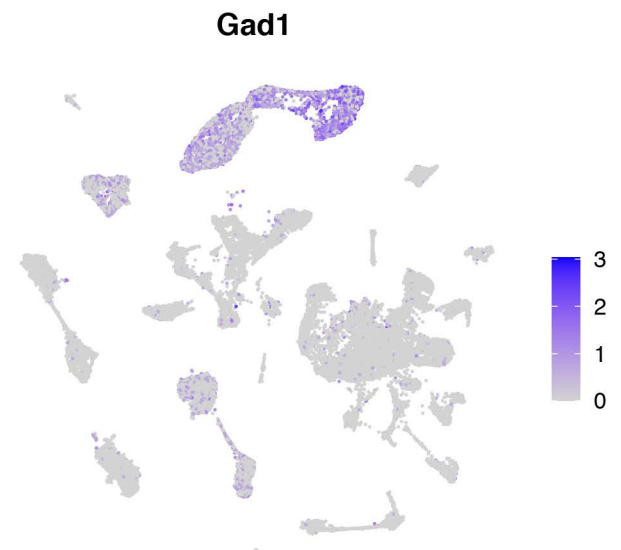

**Supplementary Fig. 2. Characterization of all nuclei sequenced and assignment of cholinergic clusters.** **a**, UMAP showing all nuclei analyzed, segregated into 38 distinct clusters. **b**, UMAP showing assignment of clusters by cell type. **c**, Feature plots showing expression of the neuronal marker *Snap25*, the cholinergic neuron marker *Chat*, the excitatory neuron marker *Slc17a6*, and the inhibitory neuron marker *Gad1* across all nuclei analyzed in this study.

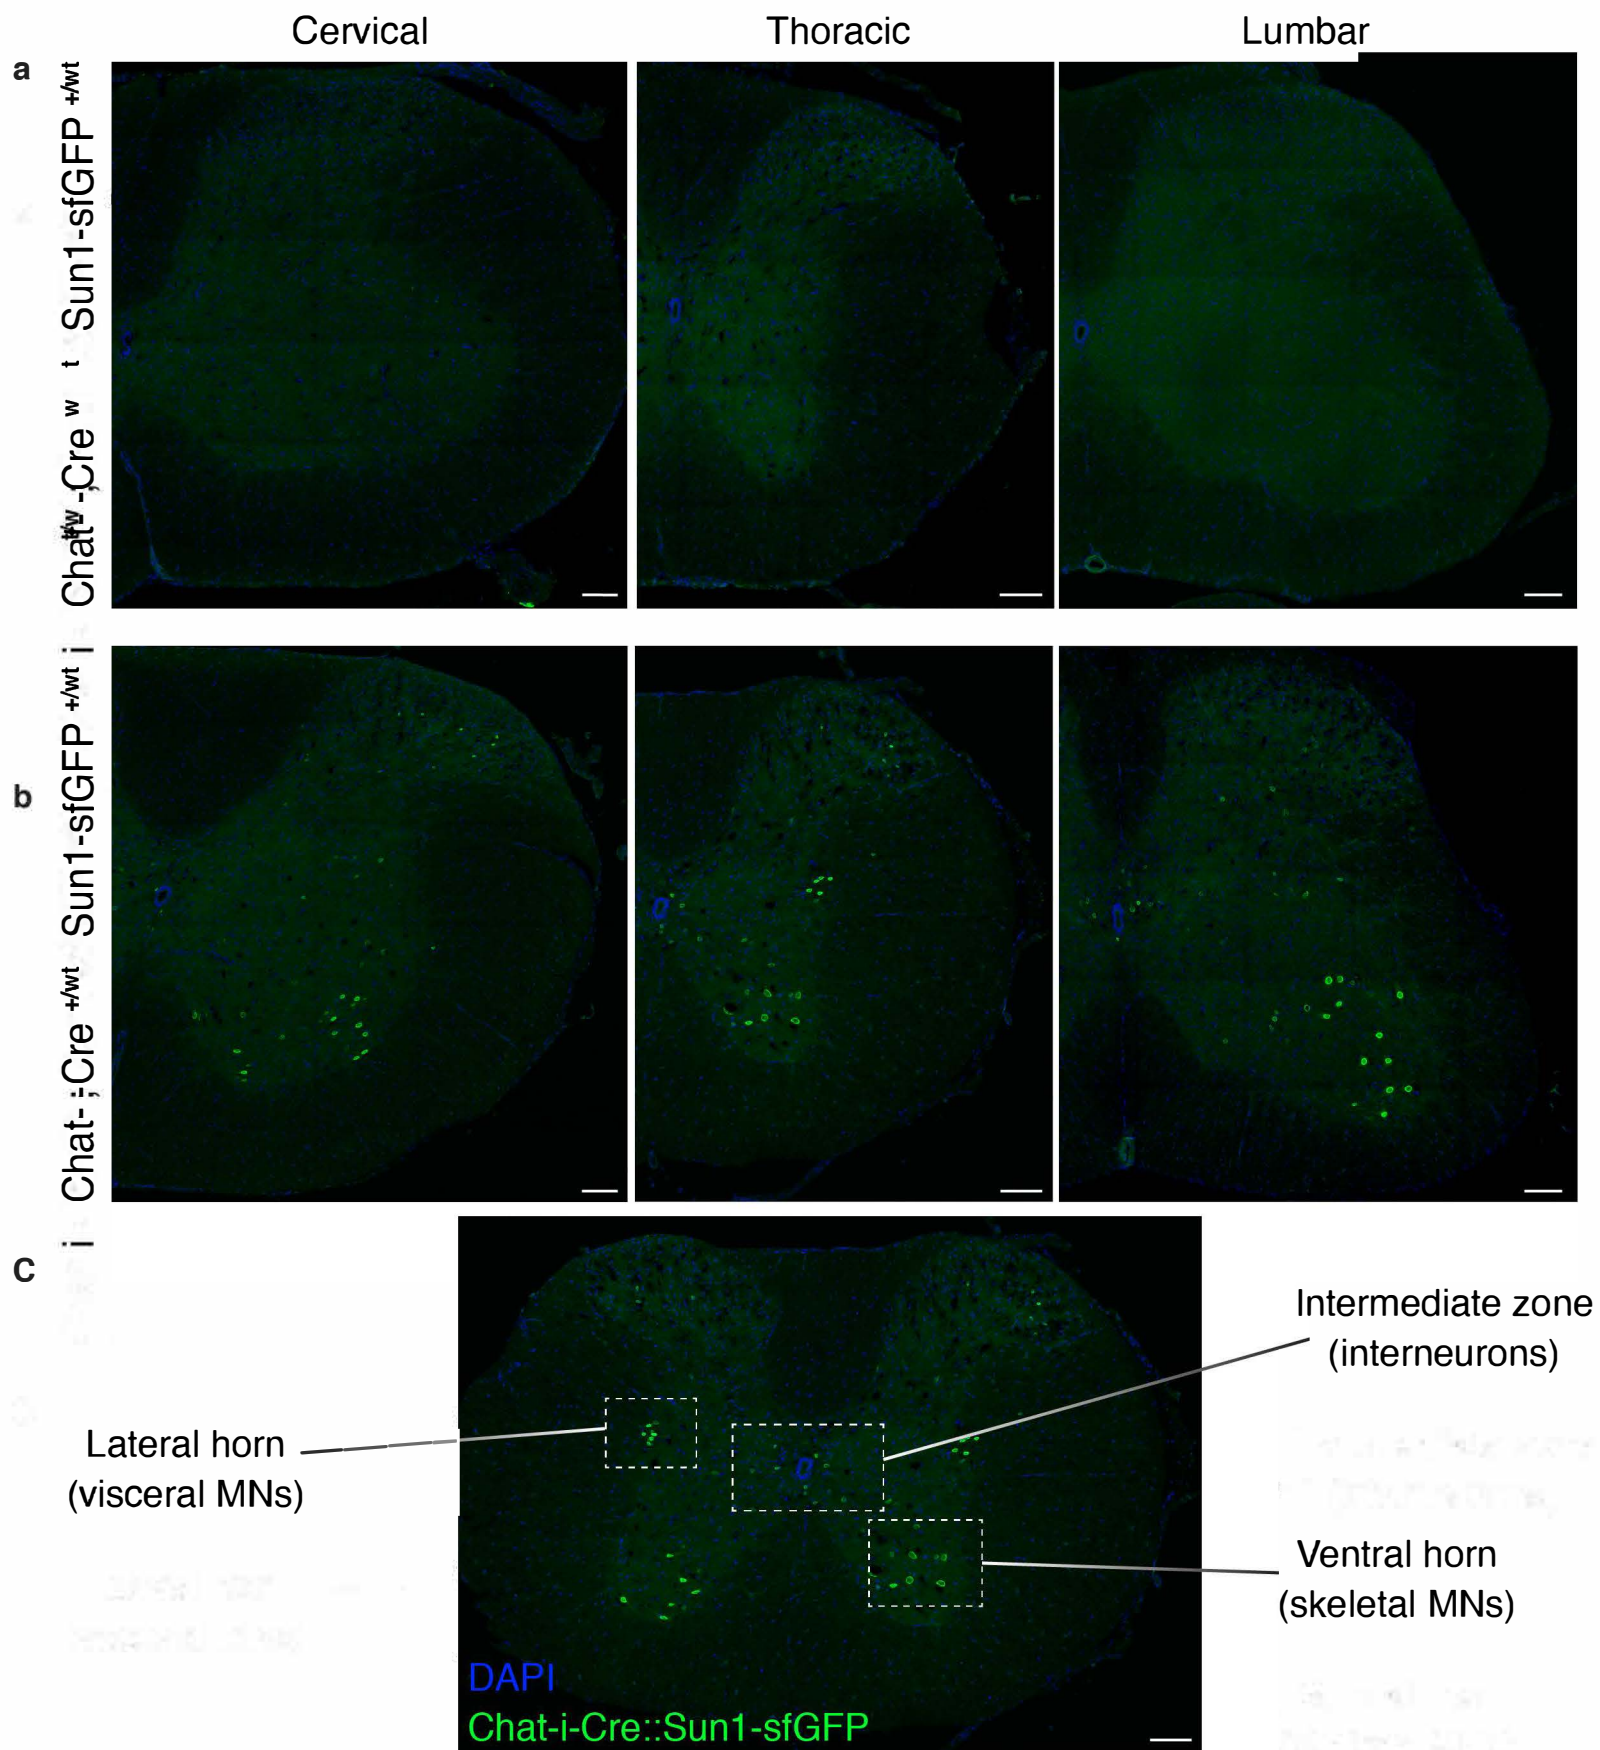

**Supplementary Fig 3. Cre-negative mice do not express Cre-dependent Sun1-sfGFP.** **a**, Examples of cervical, thoracic, and lumbar levels in Chat-Cre wt/wt; Sun1-sfGFP +/wt mice showing lack of baseline recombination events resulting in non-specific GFP expression. **b**, Examples of Chat-Cre +/wt; Sun1-sfGFP +/wt mice showing GFP expression. **c**, Example image highlighting the endogenously labeled visceral MNs in the lateral horn, skeletal MNs in the ventral horn, and interneurons in the intermediate zone. Scale bars, 100  $\mu$ m.



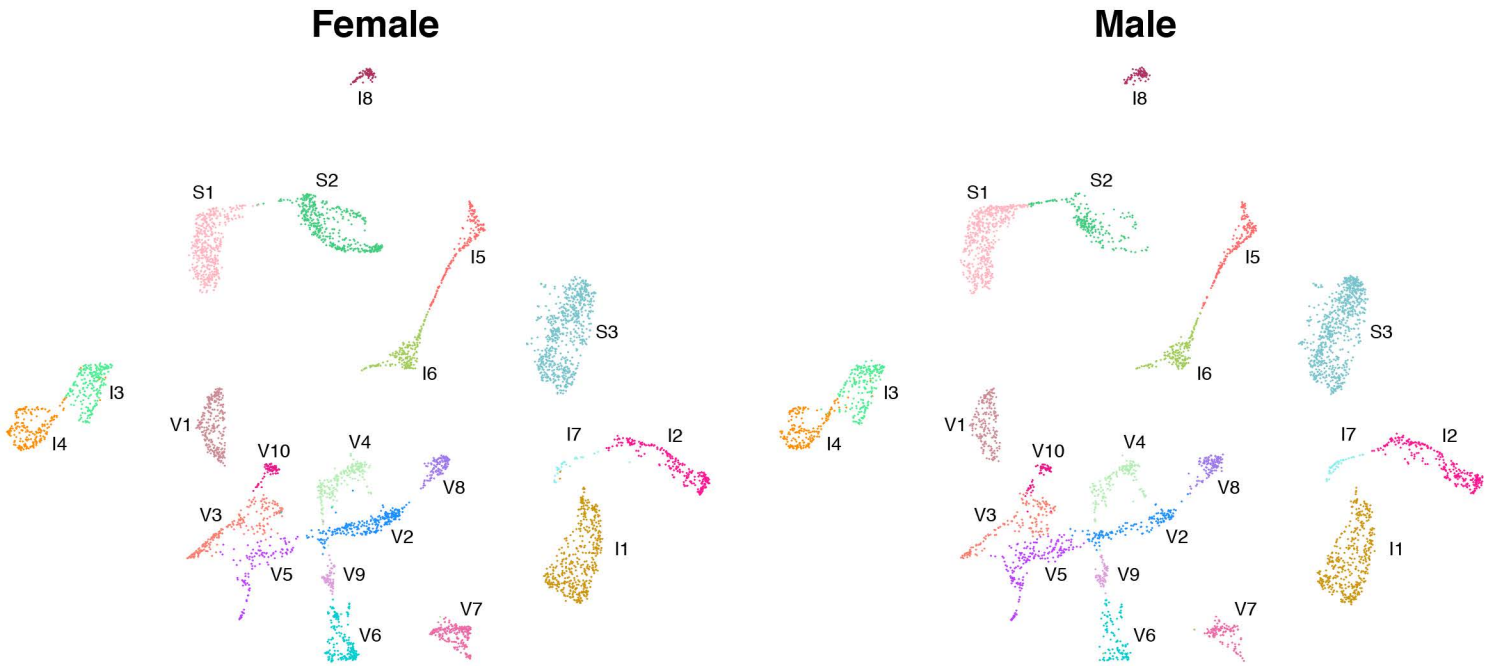

**Supplementary Fig 4. Cholinergic neurons do not exhibit notable transcriptional sex differences. a,** UMAPs showing female nuclei (left) and male nuclei (right) in each cluster. No cluster is unique to either sex.

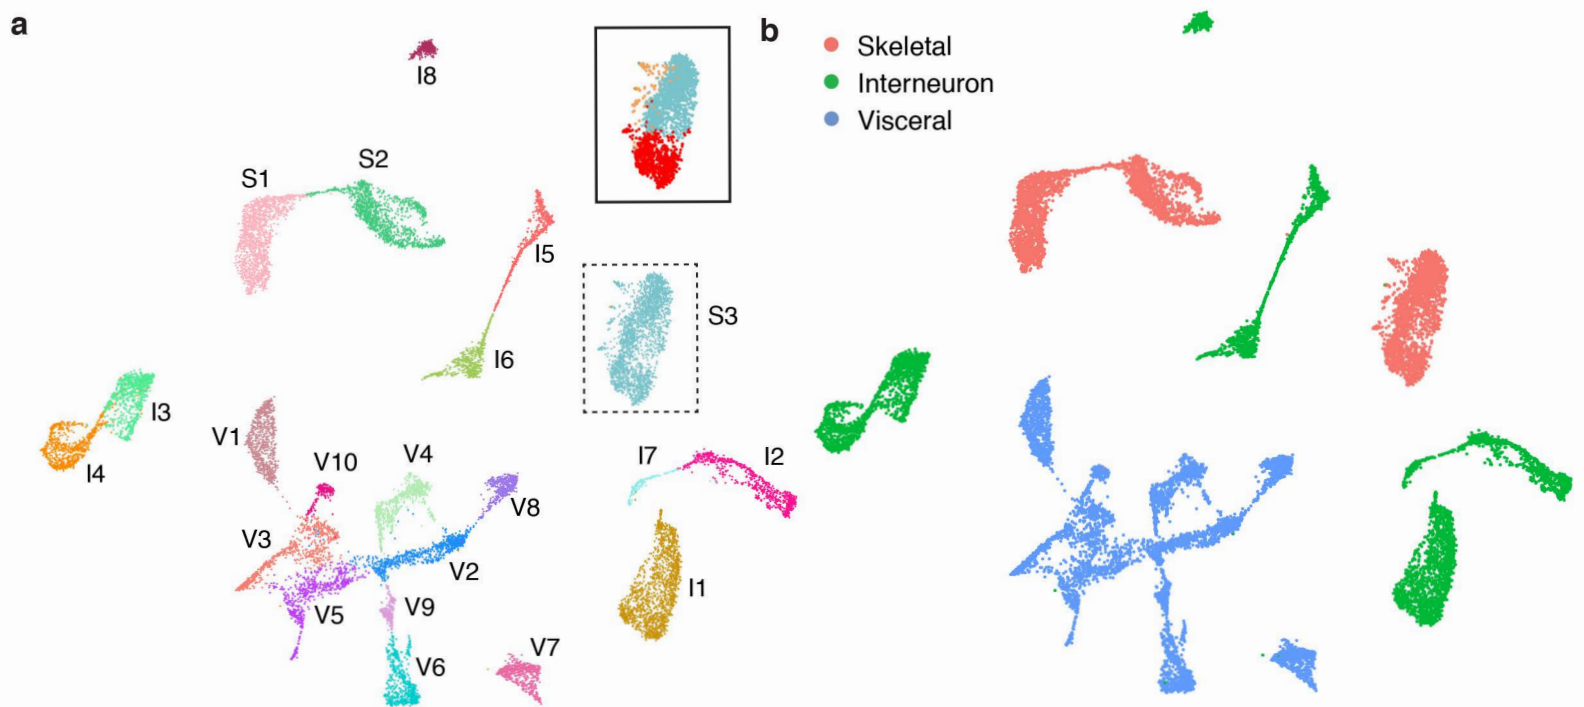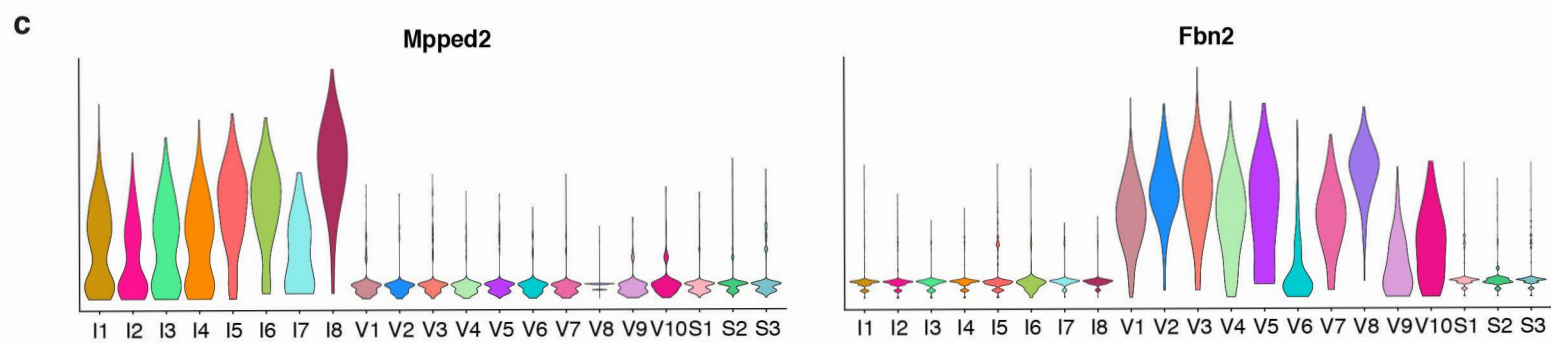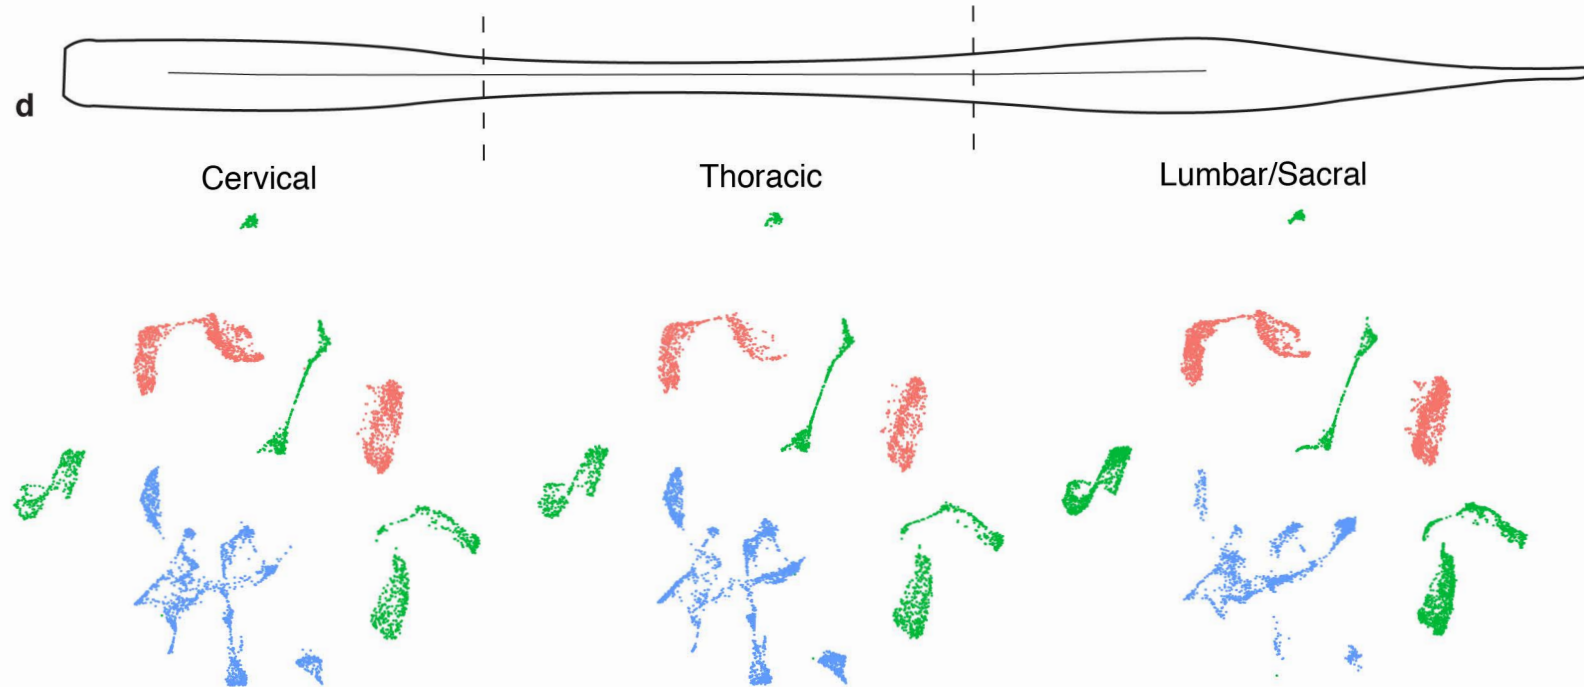

**Supplementary Fig. 5. Cholinergic neuron clusters can be classified by type and vary across spinal cord regions.** **a**, UMAP of all cholinergic clusters. Prior to renaming, cluster S3 divided into 3 closely related groups (boxed) that were merged due to their high transcriptional similarity. **b**, UMAP showing skeletal (red), interneuron (green), and visceral (blue) clusters. **c**, *Mpped2* is a distinct marker for all cholinergic interneuron clusters, while *Fbn2* labels clusters V7 and V8 as visceral MNs. **d**, UMAPs of cells detected in each spinal cord region (cervical, thoracic, and lumbar/sacral) showing variability in cholinergic neurons along the rostro-caudal axis of the spinal cord.



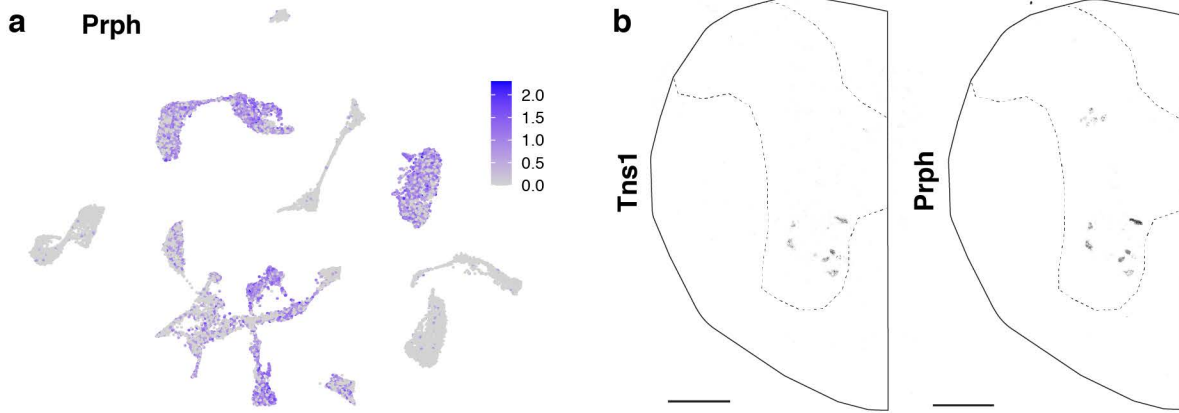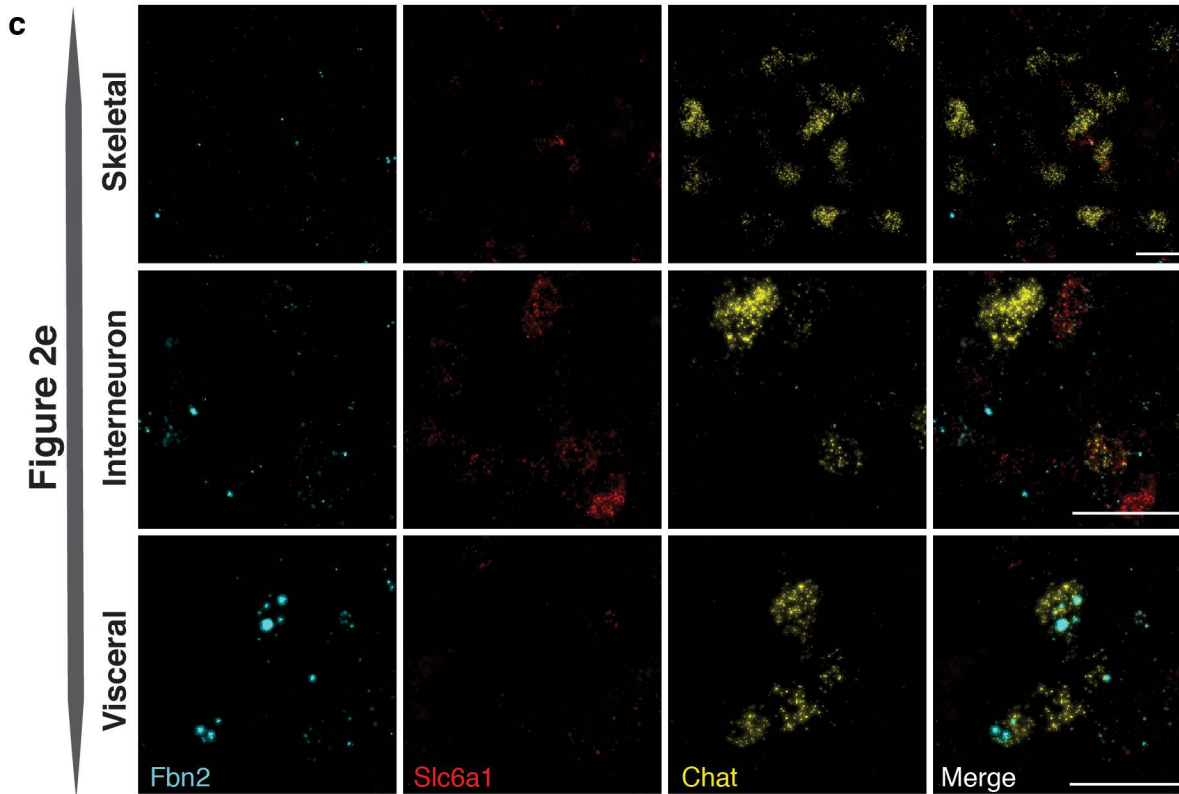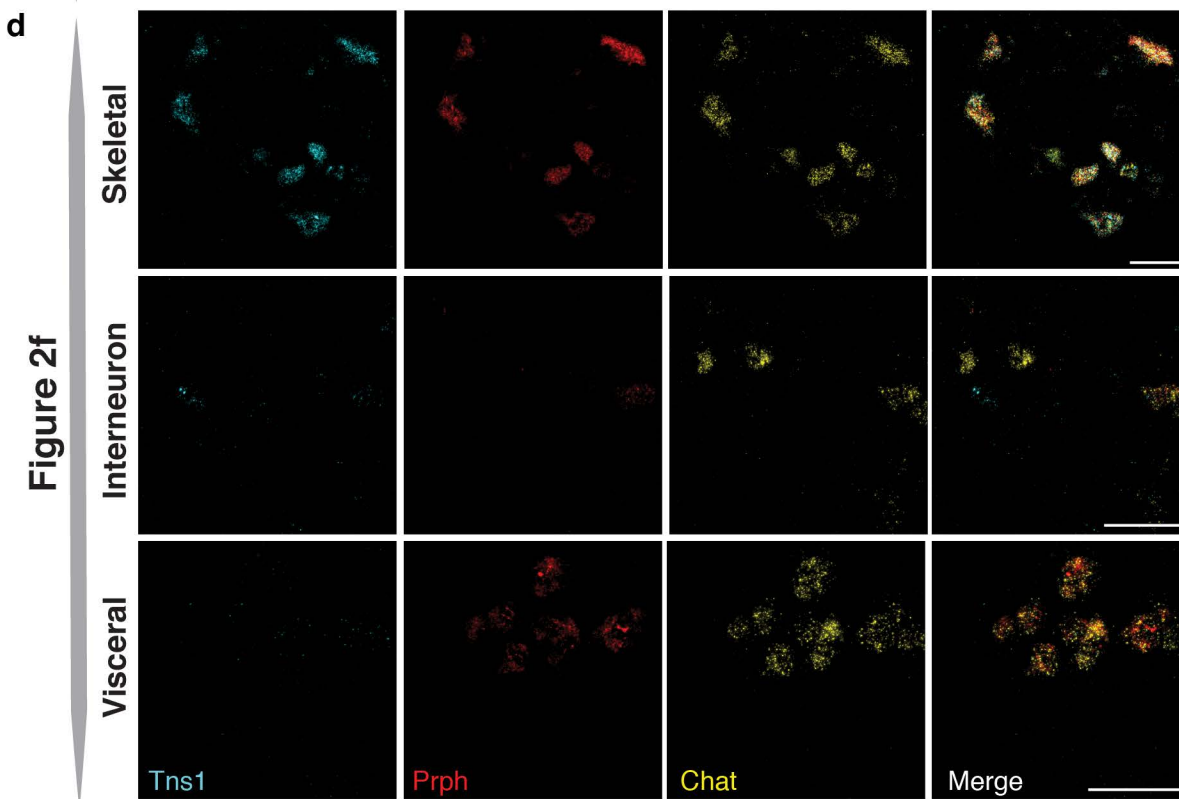

**Supplementary Fig. 6. Expression of cholinergic subtype markers.** **a**, A feature plot showing extent of expression of *Prph* in our dataset across all cholinergic clusters. **b**, Low magnification images of *Tns1* expression, localized to the ventral horn, and *Prph* in ventral and lateral horn of thoracic spinal cord. **c**, High magnification images of skeletal MNs (ventral horn), interneurons (intermediate zone), and visceral MNs (lateral horn) from Figure 2e showing expression of *Fbn2* (cyan), *Slc6a1* (red), and *Chat* (yellow) in each channel individually, and merged. **d**, High magnification images of skeletal MNs (ventral horn), interneurons (intermediate zone), and visceral MNs (lateral horn) from Figure 2f showing expression of *Tns1* (cyan), *Prph* (red), and *Chat* (yellow) in each channel individually, and merged. Low magnification scale bars, 200  $\mu\text{m}$ . High magnification scale bars, 50  $\mu\text{m}$ .

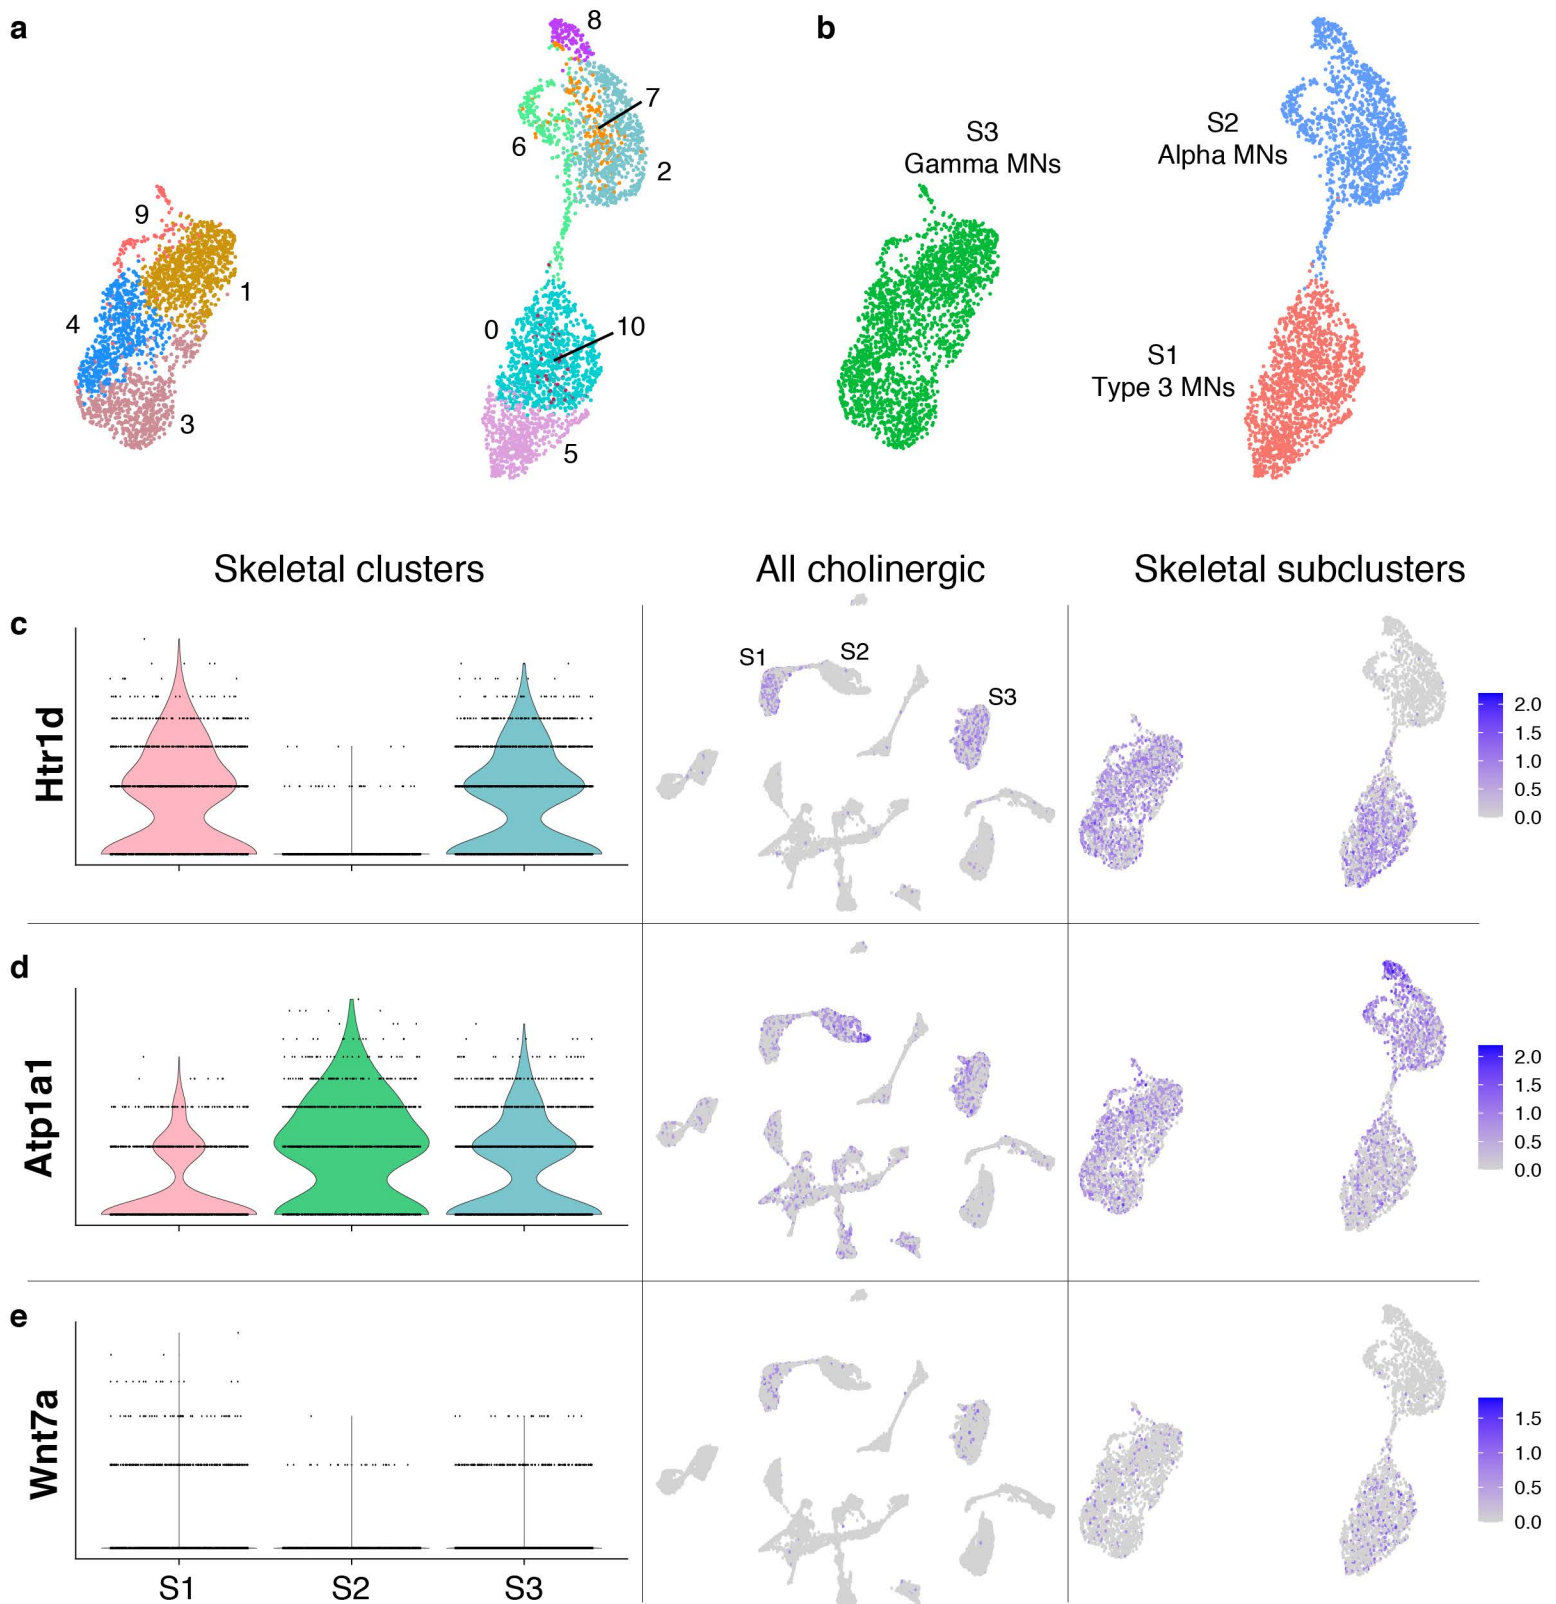

**Supplementary Fig. 7. Expression of known skeletal subtype markers in our dataset.** **a, b**, Subclustering of just the skeletal MNs reveals 4 subtypes of alpha, 3 of Type 3, and 4 of gamma MNs. **c**, The serotonin receptor 1D (*Htr1d*) has been described as a marker mainly expressed in gamma MNs, but is widely expressed in skeletal MNs in our nuclear sequencing dataset. **d**, The ATPase Na<sup>+</sup>/K<sup>+</sup> transporting alpha 1 (*Atp1a1*) is considered a marker for alpha motor neurons, but is widely expressed in our dataset. **e**, *Wnt7a* is known to be expressed selectively in gamma MNs starting at late embryonic stages, but is found in both gamma and Type 3 MNs in our dataset.

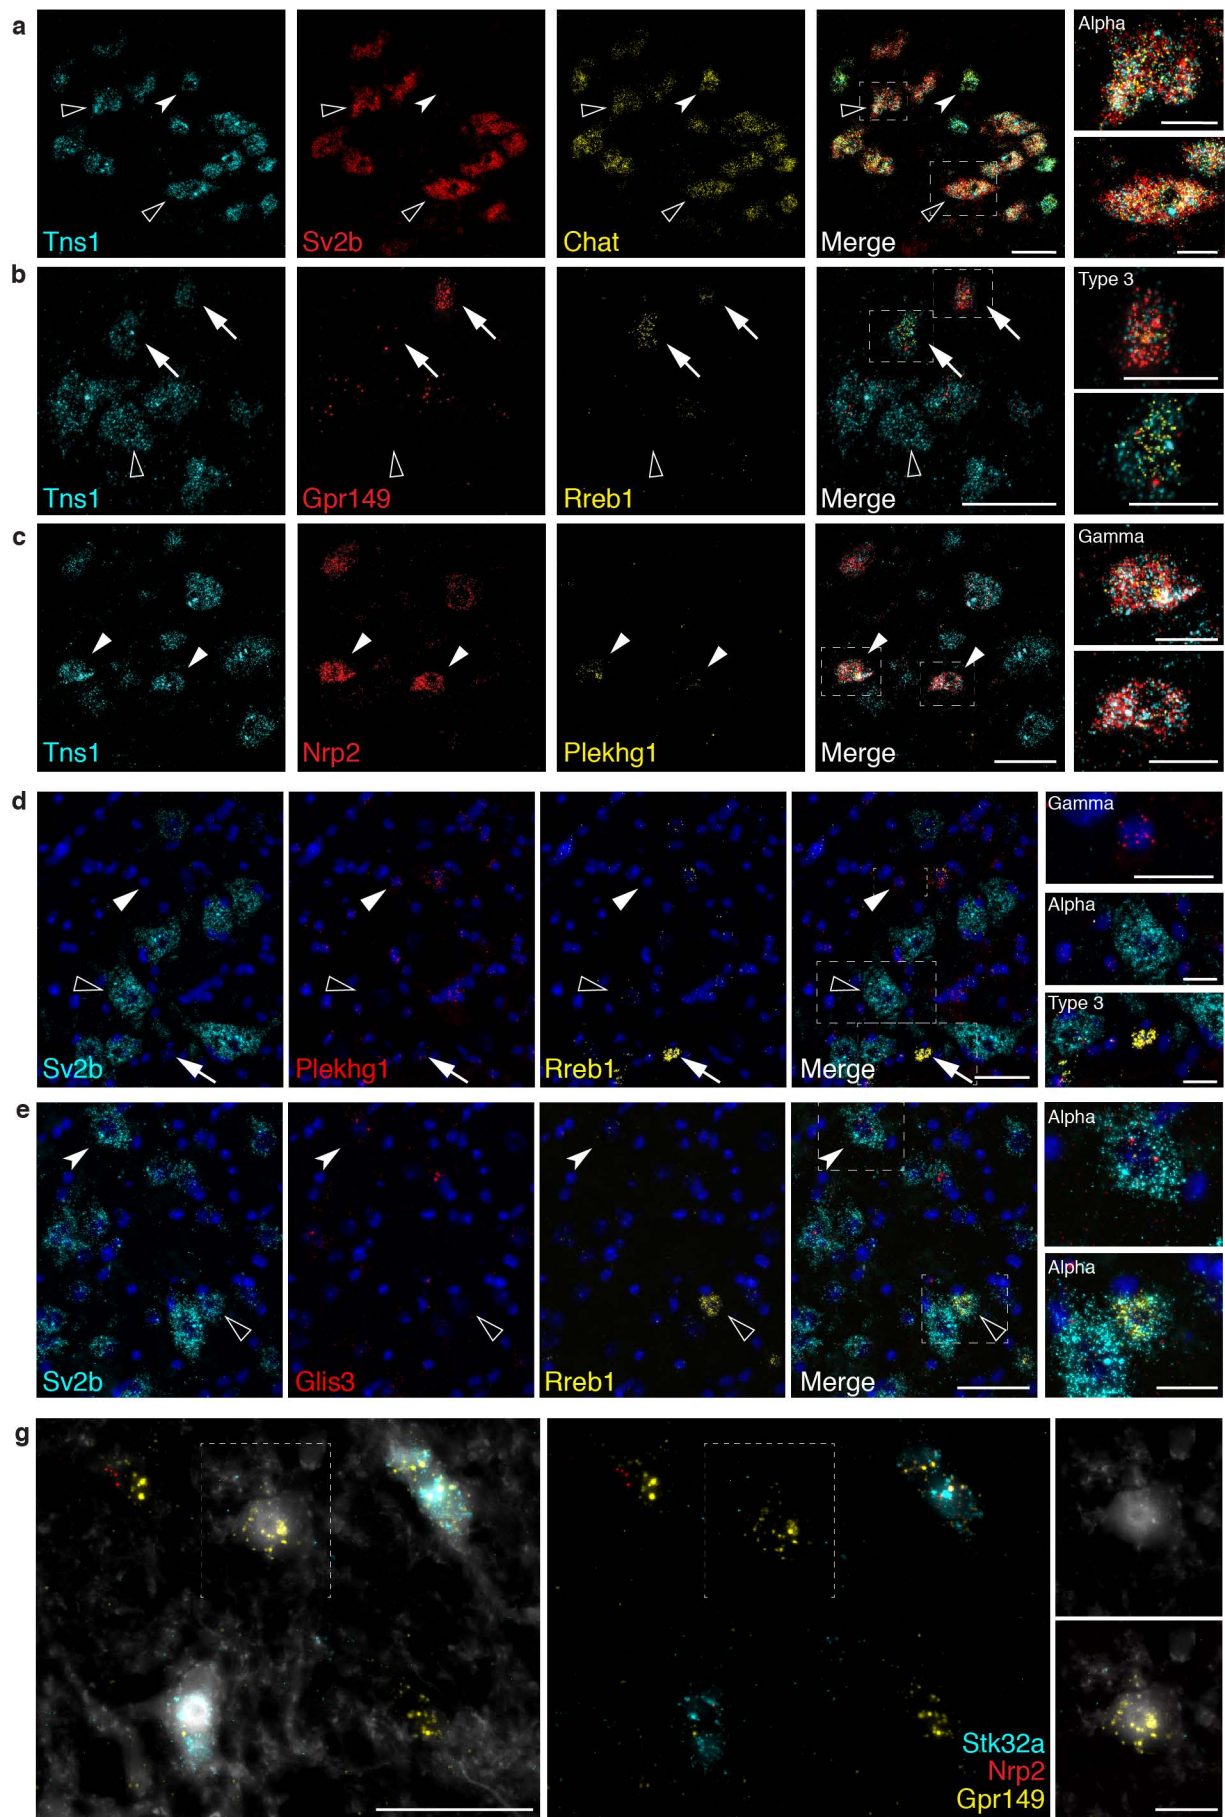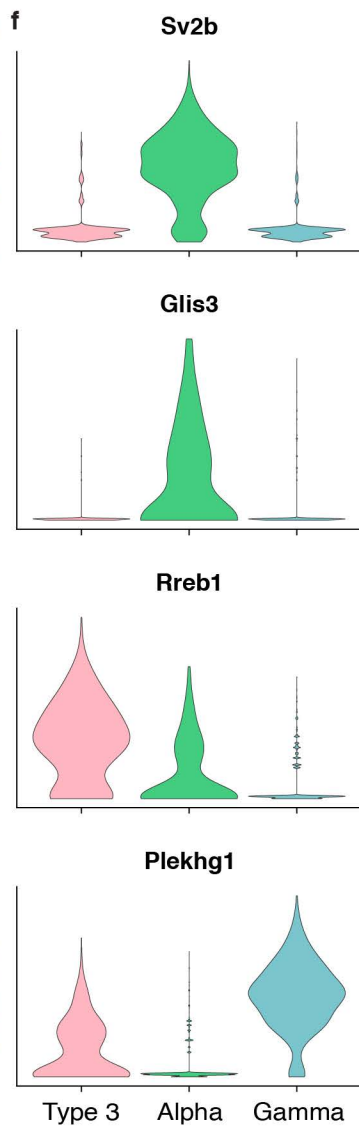

**Supplementary Fig 8. Expression of additional novel markers of alpha, gamma, and Type 3 MNs.**

**a**, ISH showing expression of novel alpha MN marker *Sv2b* (red) restricted to a subset of large diameter *Tns1+* (cyan) *Chat+* (yellow) neurons. Pointed arrowhead highlights example of a *Sv2b*-negative MN of smaller diameter (i.e. Type 3 or gamma). High magnification images of triple positive alpha MNs (open arrowheads). **b**, Smaller diameter Type 3 MNs among *Tns1+* skeletal MNs (cyan) as revealed by expression of *Gpr149* (red) (arrow, top box), or *Rreb1* (yellow; arrow, bottom box) near a large diameter MN negative for both markers (open arrowhead). **c**, Field of *Tns1+* skeletal MNs (cyan) containing four *Nrp2*-expressing gamma MNs (red), some of which co-expressed *Plekhg1* (yellow, filled arrowheads). Cells positive only for *Tns1* correspond skeletal MN types other than gamma. **d**, Lumbar spinal cord images show that *Plekhg1* alone represents gamma MNs (filled arrowhead, top), *Sv2b* (cyan) labels alpha MNs (open arrowhead, middle); *Rreb1* (yellow) alone or co-expressed with *Plekhg1* (red) represent Type 3 MNs (arrow, bottom). **e**, Sacral spinal cord images show that *Glis3* (red) expression is restricted to a subset of alpha MNs (*Sv2b+*, cyan) (pointed arrowhead, top). A subset of alpha MNs express *Rreb1* (yellow) (open arrowhead, bottom). **f**, Violin plots of *Sv2b*, *Glis3*, *Rreb1*, and *Plekhg1* expression in alpha, gamma, and Type 3 MNs. **g**, High magnification image from Fig. 3e of a Type 3 MN without C-boutons expressing *Gpr149*. Scale bars, 50  $\mu$ m. High magnification scale bars, 20  $\mu$ m.



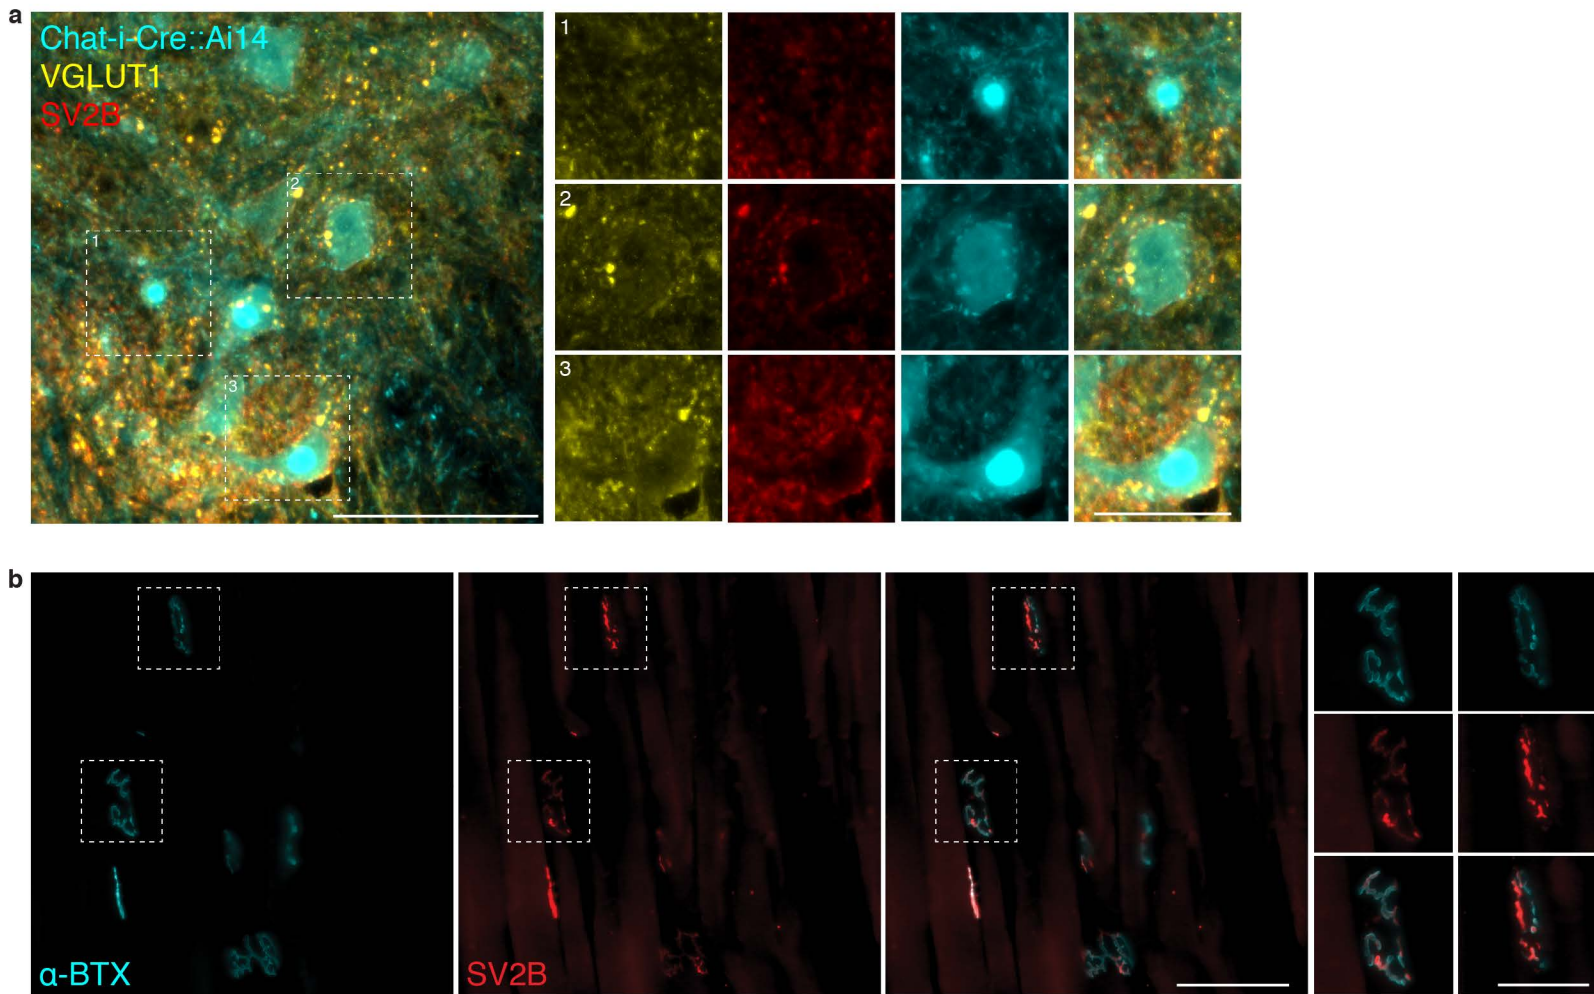

**Supplementary Fig 9. Novel alpha MN marker SV2B is detected in the spinal cord and at the neuromuscular junction.** **a**, Section of spinal cord ventral horn showing co-expression of VGLUT1 (yellow) and SV2B (red) in Chat-Cre::Ai14 labeled motor neurons (cyan). High magnifications of MN cell bodies showing presence of VGLUT1+ synapses (yellow) and C boutons (cyan) on SV2B+ alpha MNs (boxes 2 and 3) and lack of both synapse types on a SV2B- gamma or Type 3 MN (box 1). Interestingly, the VGLUT1 and SV2B signals appear localize to the same synapses; the overlapping yellow and red signals are not due to bleed through since they correspond to Alexa488 and Alexa647 respectively. **b**, Section of tibialis anterior muscle showing co-expression of SV2B (red) with the NMJ marker  $\alpha$ -bungarotoxin (cyan). High magnification images highlight 2 NMJs co-expressing both markers. Low magnification scale bar, 100  $\mu$ m. High magnification scale bar, 50  $\mu$ m.



**a** Phrenic

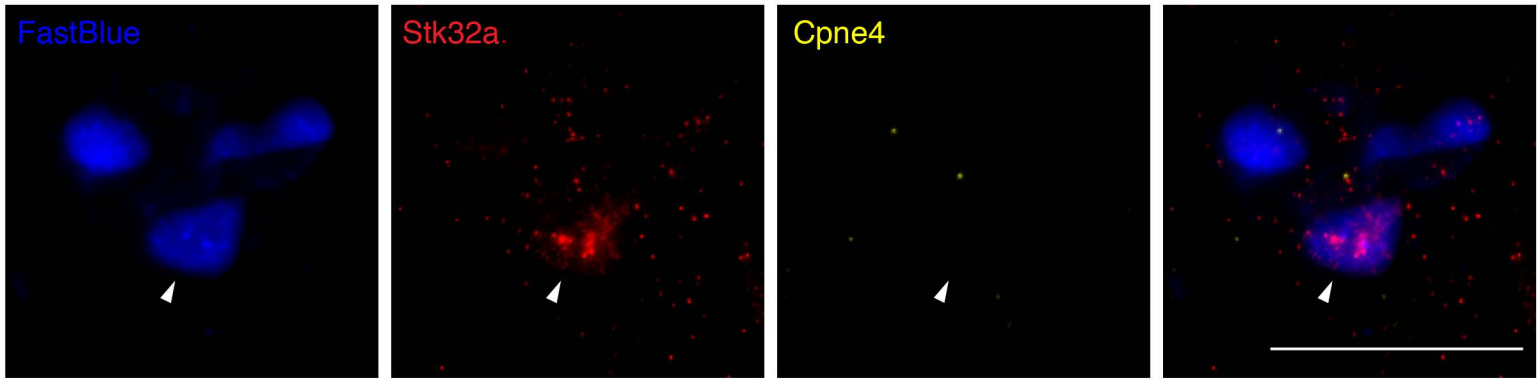

**b** Digit

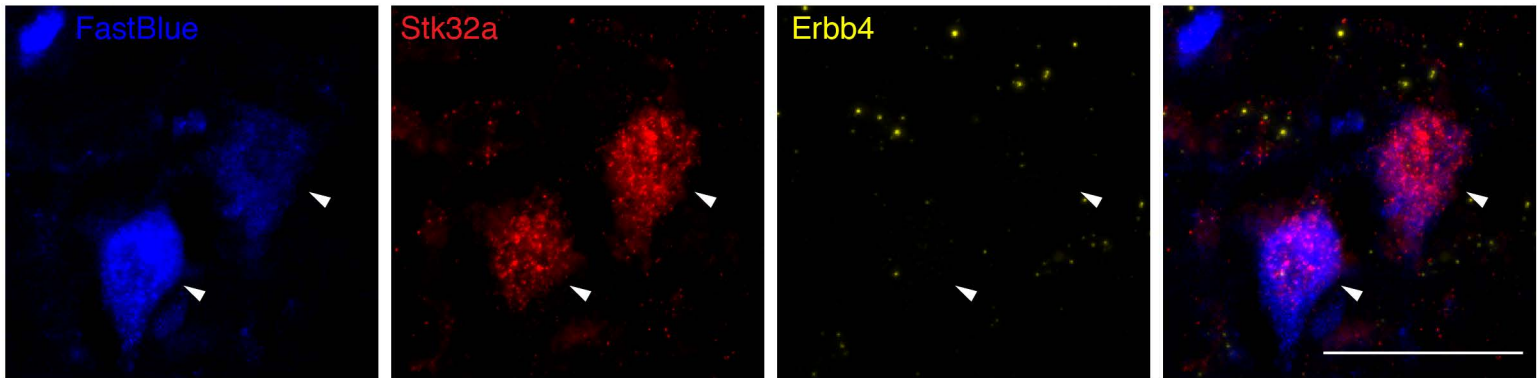

**Supplementary Fig. 10. Additional examples of alpha motor neuron cluster marker expression in retrogradely labeled neurons. a**, ISH of retrogradely labeled tissue showing no expression of the cluster 4 digit-innervating MN marker *Cpne4* (yellow) in phrenic MNs (blue). Filled arrowhead highlights a phrenic MN expressing high levels of *Stk32a* that was included in the analysis for alpha MNs. **b**, ISH of retrogradely labeled tissue showing lack of expression of the cluster 7 phrenic MN marker *Erbb4* (yellow) in digit-innervating MNs (blue). Scale bars, 50  $\mu$ m.

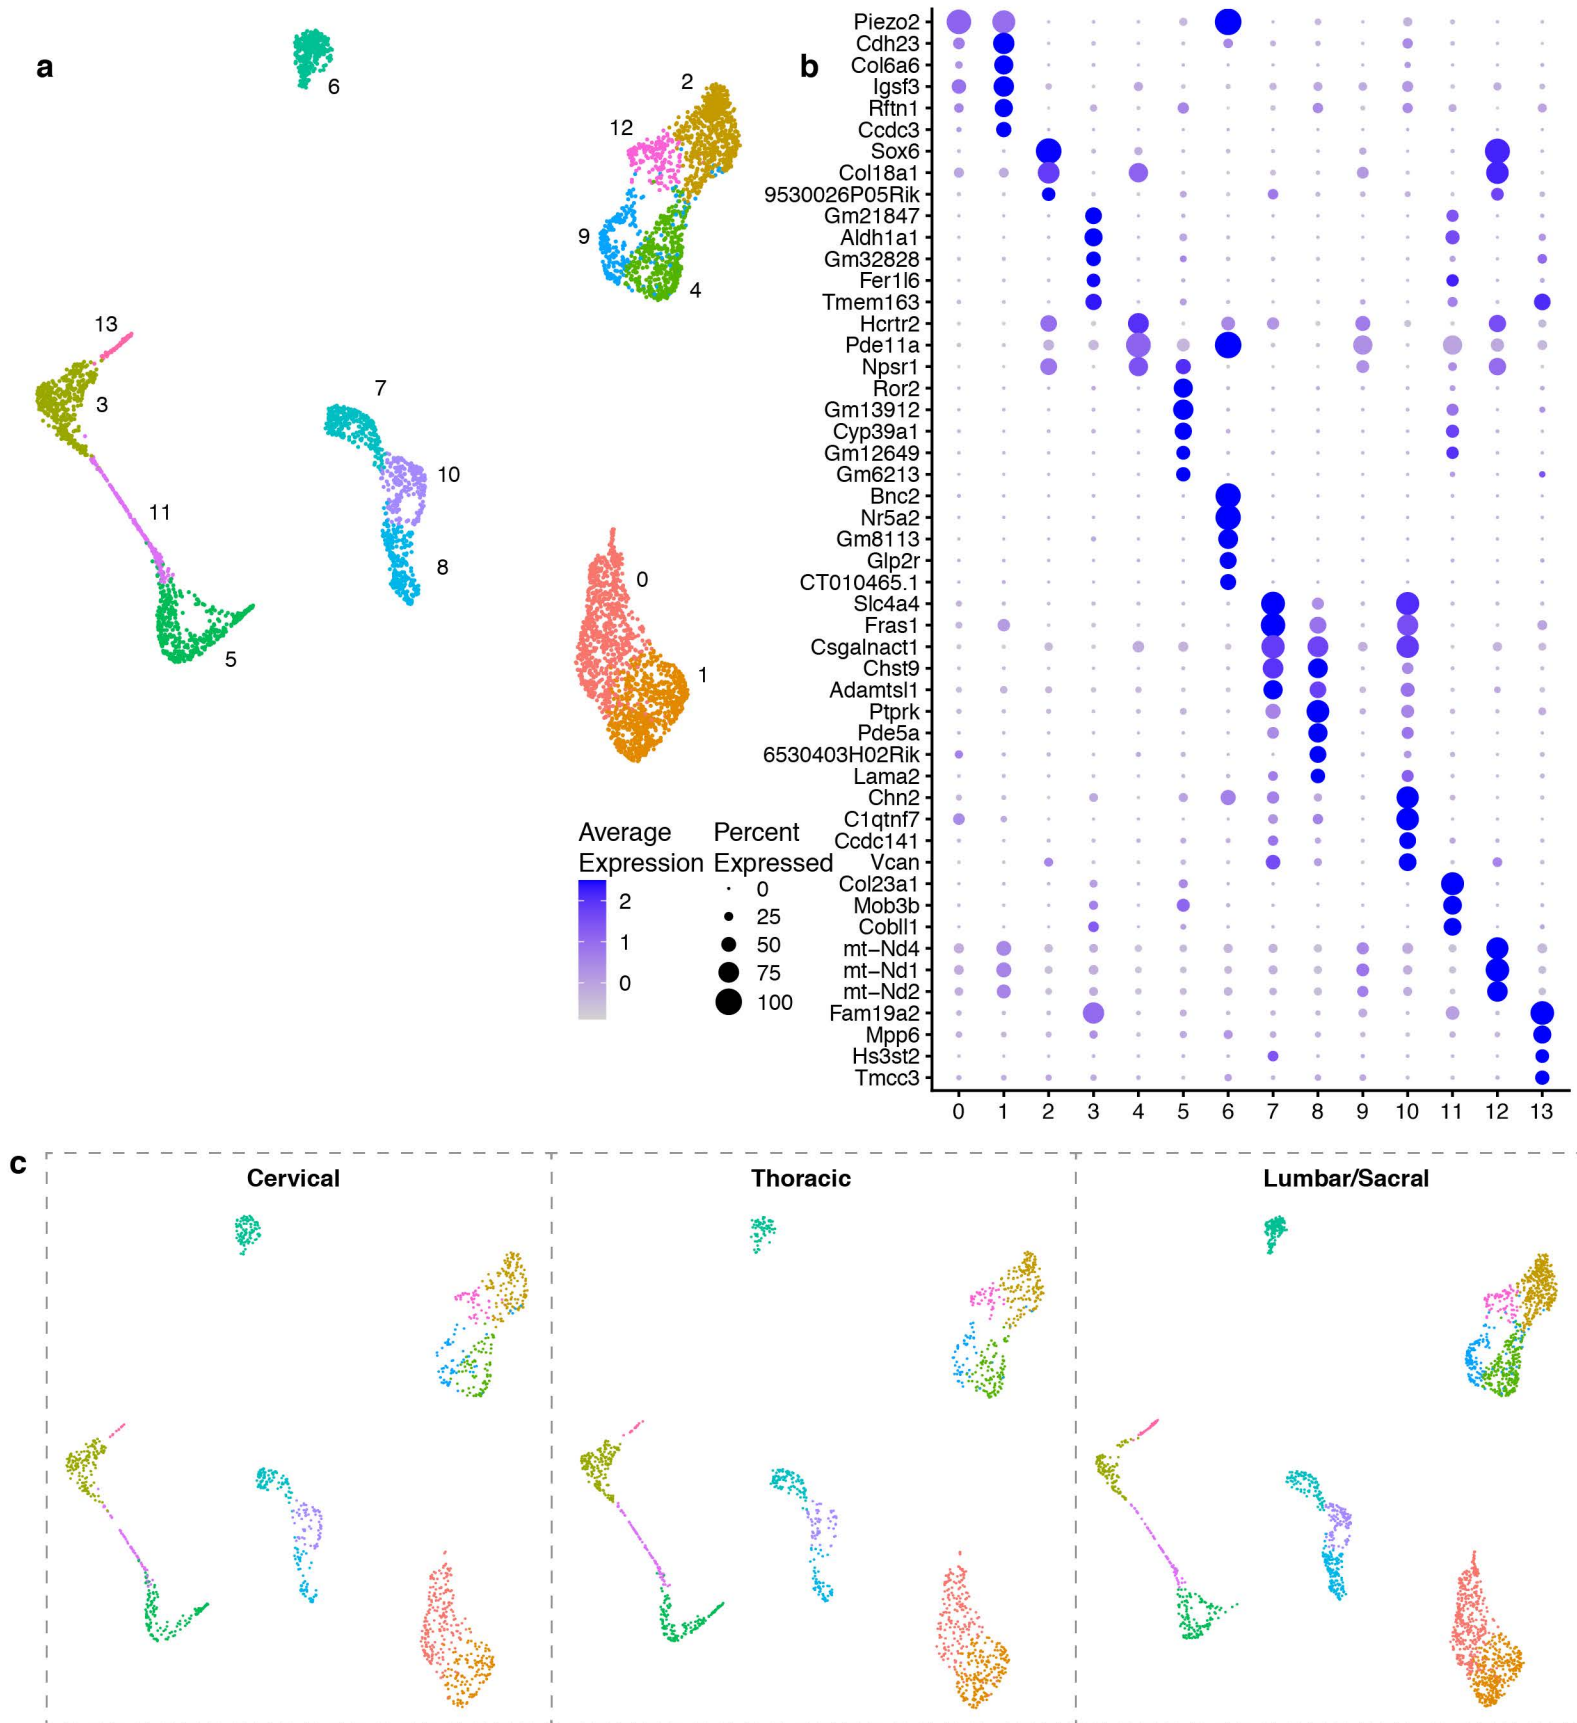

**Supplementary Fig. 11. Subclustering of cholinergic interneurons reveals 14 subtypes.** **a**, Cholinergic interneurons can be subclustered into 14 distinct subtypes. **b**, Dot plot showing expression of the top 5 marker genes for each interneuron subcluster. **c**, UMAPs of cholinergic interneurons detected in this study at each spinal cord level.

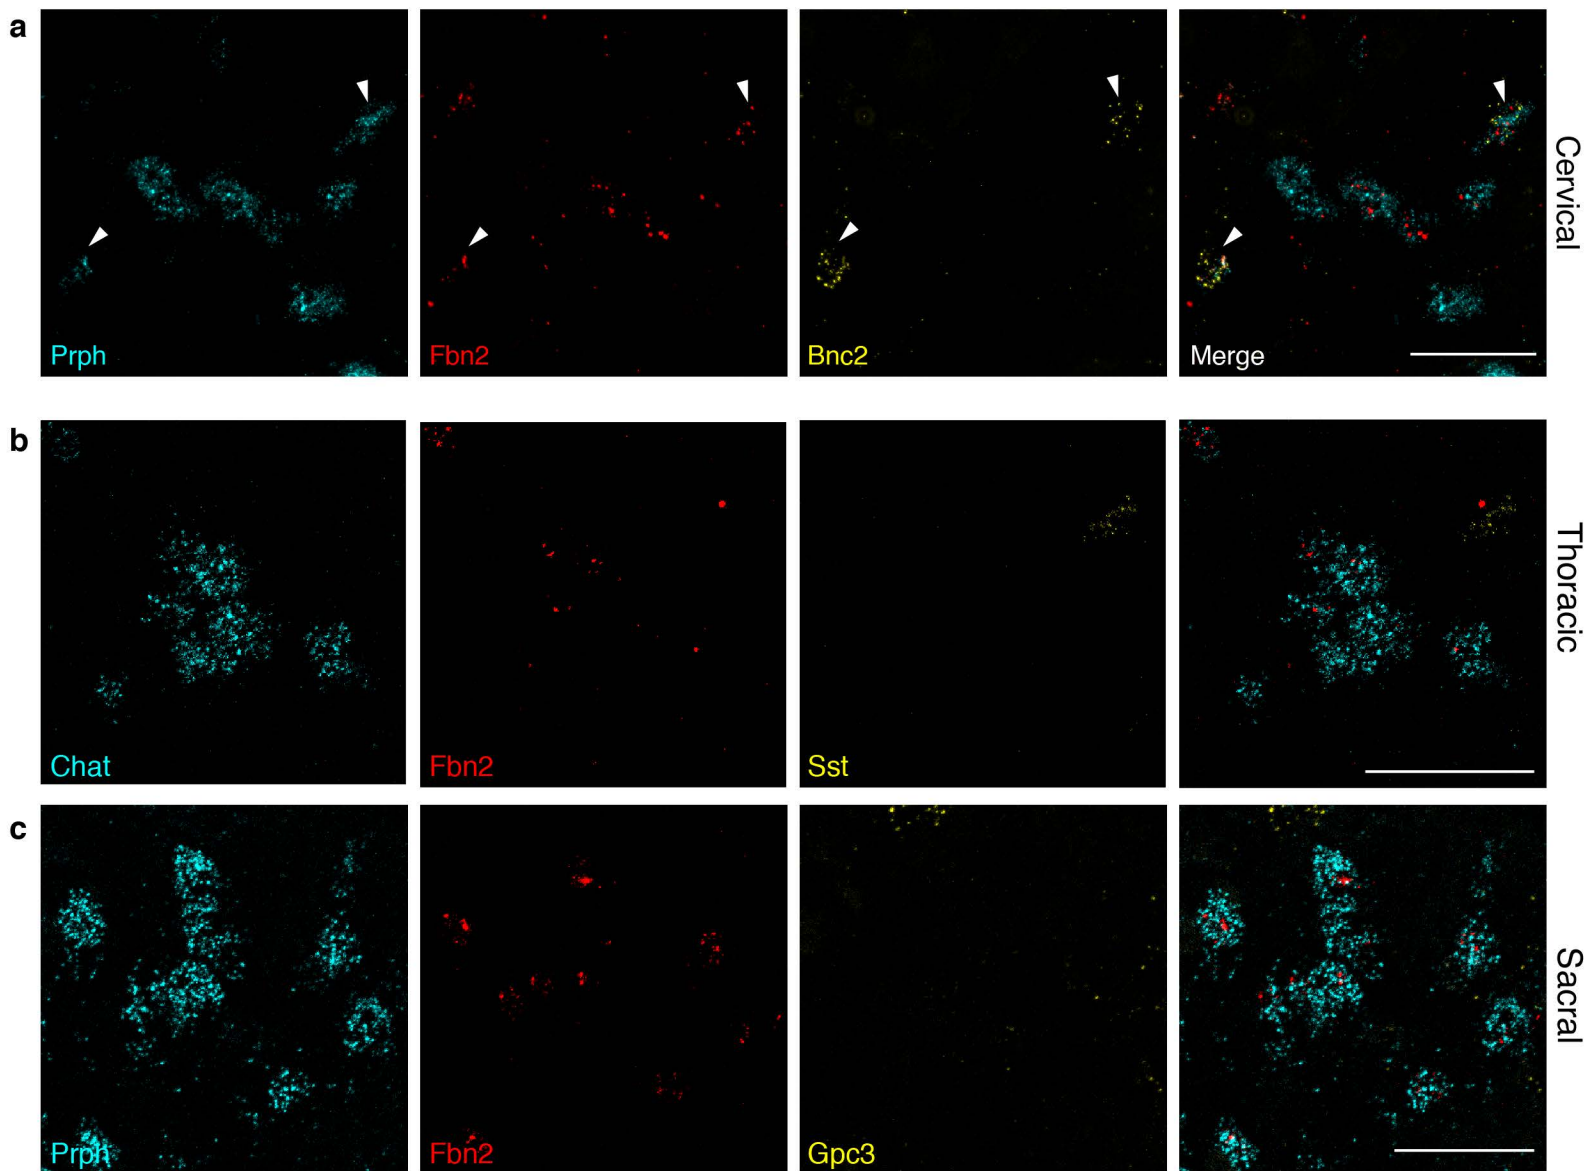

**Supplementary Fig. 12. Markers for subtypes of visceral MNs in different spinal cord levels.** **a**, *Bnc2* labels a small population of visceral MNs only in the cervical spinal cord. Arrowheads highlight cells that coexpress *Bnc2* (yellow), the visceral MN marker *Fbn2* (red), and the MN marker *Prph* (cyan). **b**, ISH highlighting visceral MNs negative for sacral-specific cluster marker *Sst* (yellow) in thoracic spinal cord. **c**, ISH highlighting visceral MNs negative for cervical-specific cluster marker *Gpc3* (yellow) in sacral spinal cord. Scale bars, 50  $\mu$ m.



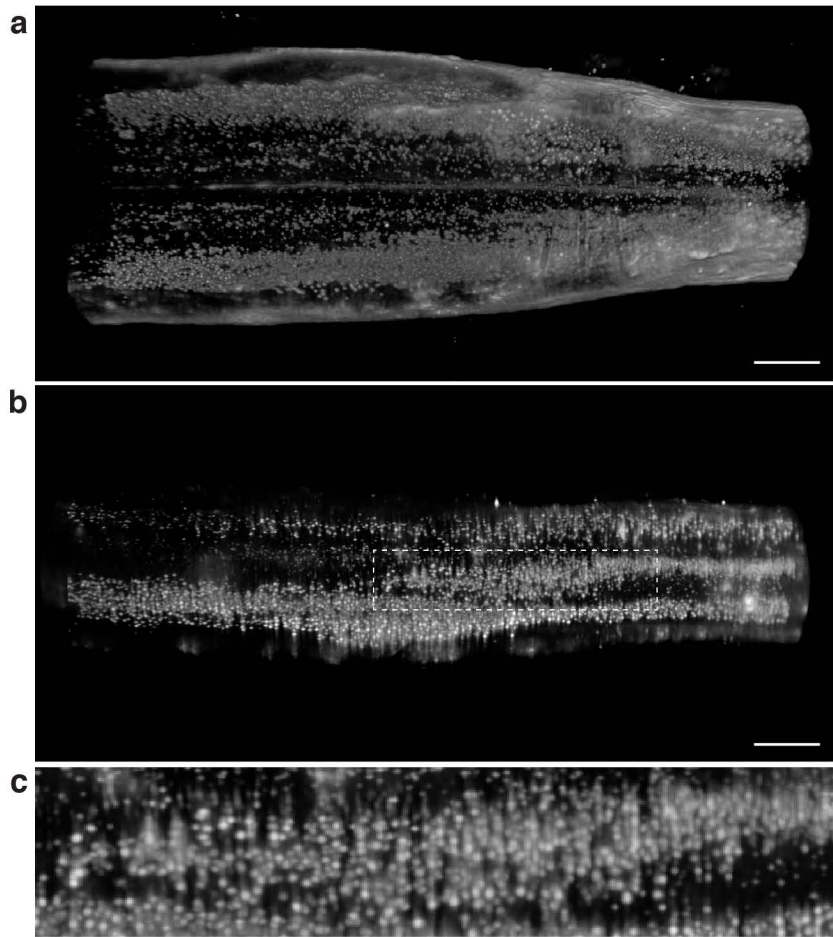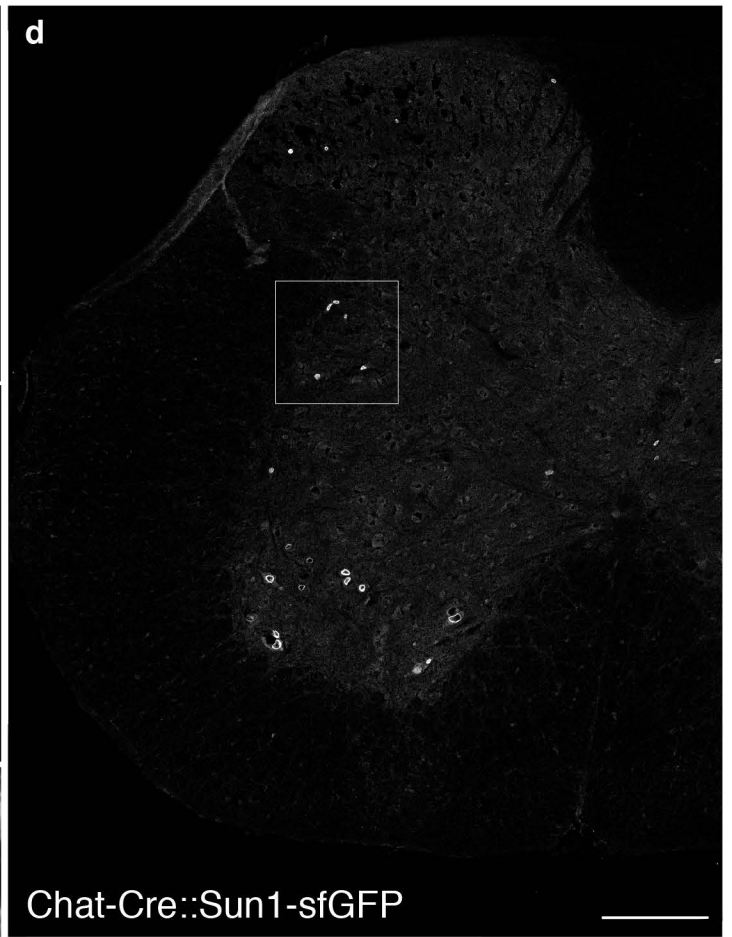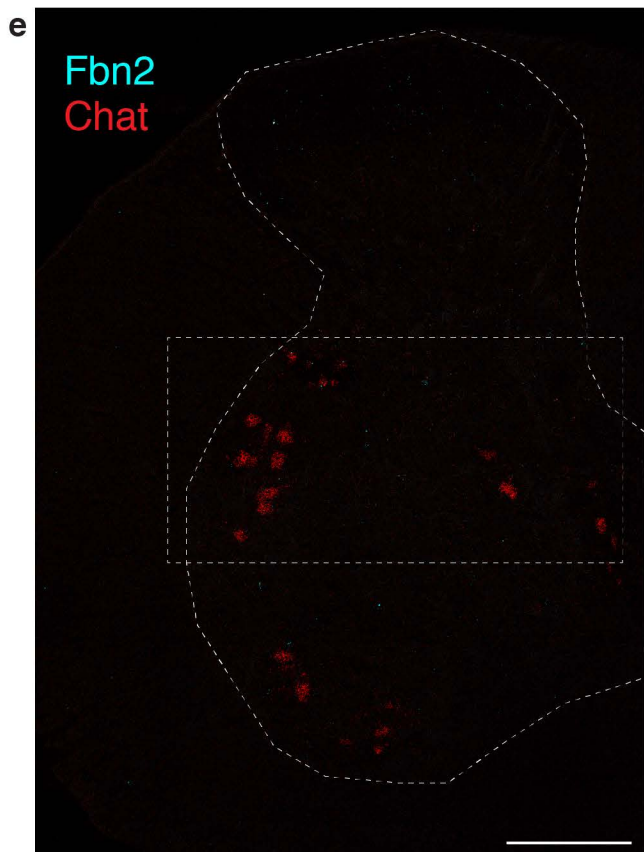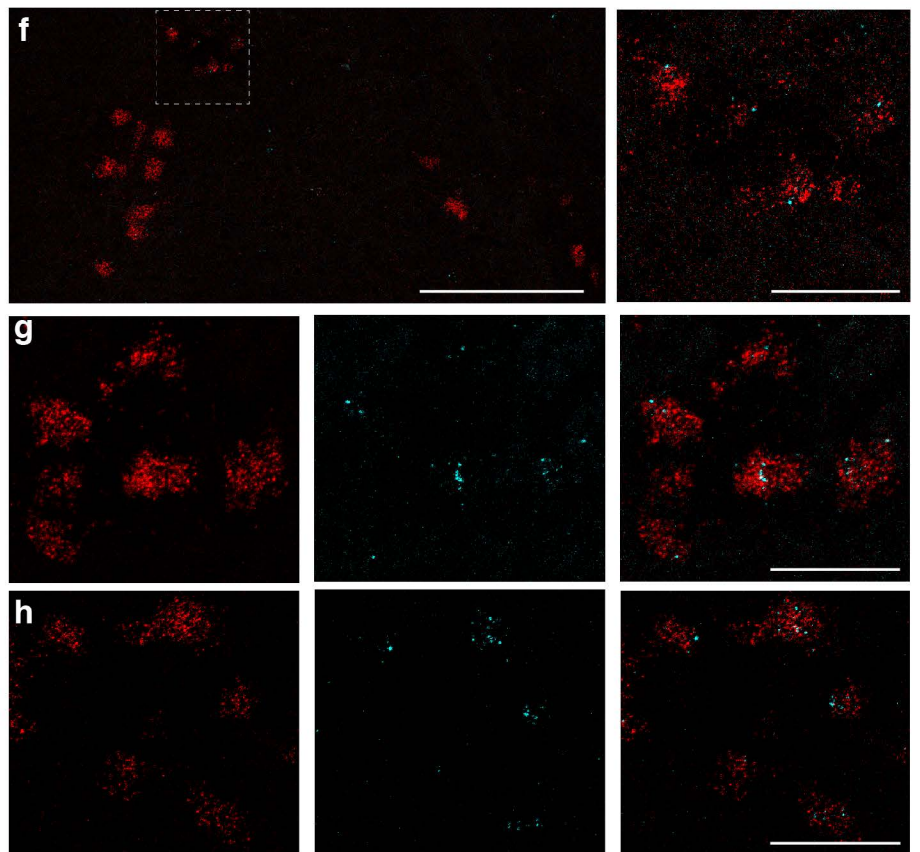

**Supplementary Fig. 13. The intermediolateral cell column, where visceral MNs are found, extends into the cervical spinal cord.** **a**, Dorsal view of a whole, cleared cervical SC from a *Chat-Cre::Sun1-sfGFP* mouse showing GFP expression. **b**, Lateral view of a whole, cleared cervical SC, aligned with the dorsal view above (a), showing the extension of the intermediolateral cell column into lower levels of the cervical SC. **c**, High magnification view of the lateral column highlighted in b. **d**, Coronal view of *Chat-Cre::Sun1-sfGFP* in cervical spinal cord, showing nuclear envelope GFP expression in the lateral horn (boxed). **e**, ISH showing expression of *Fbn2* in *Chat*<sup>+</sup> cervical SC neurons. **f**, Boxed region from e and higher magnification view of the lateral horn with distinct *Fbn2* expression in lateral horn neurons. **g, h**, Additional high magnification examples of cervical lateral horn neurons exhibiting frequent co-expression of *Fbn2* and *Chat*. Whole tissue scale bars, 500  $\mu$ m. Low magnification scale bars, 200  $\mu$ m. High magnification scale bars, 50  $\mu$ m.

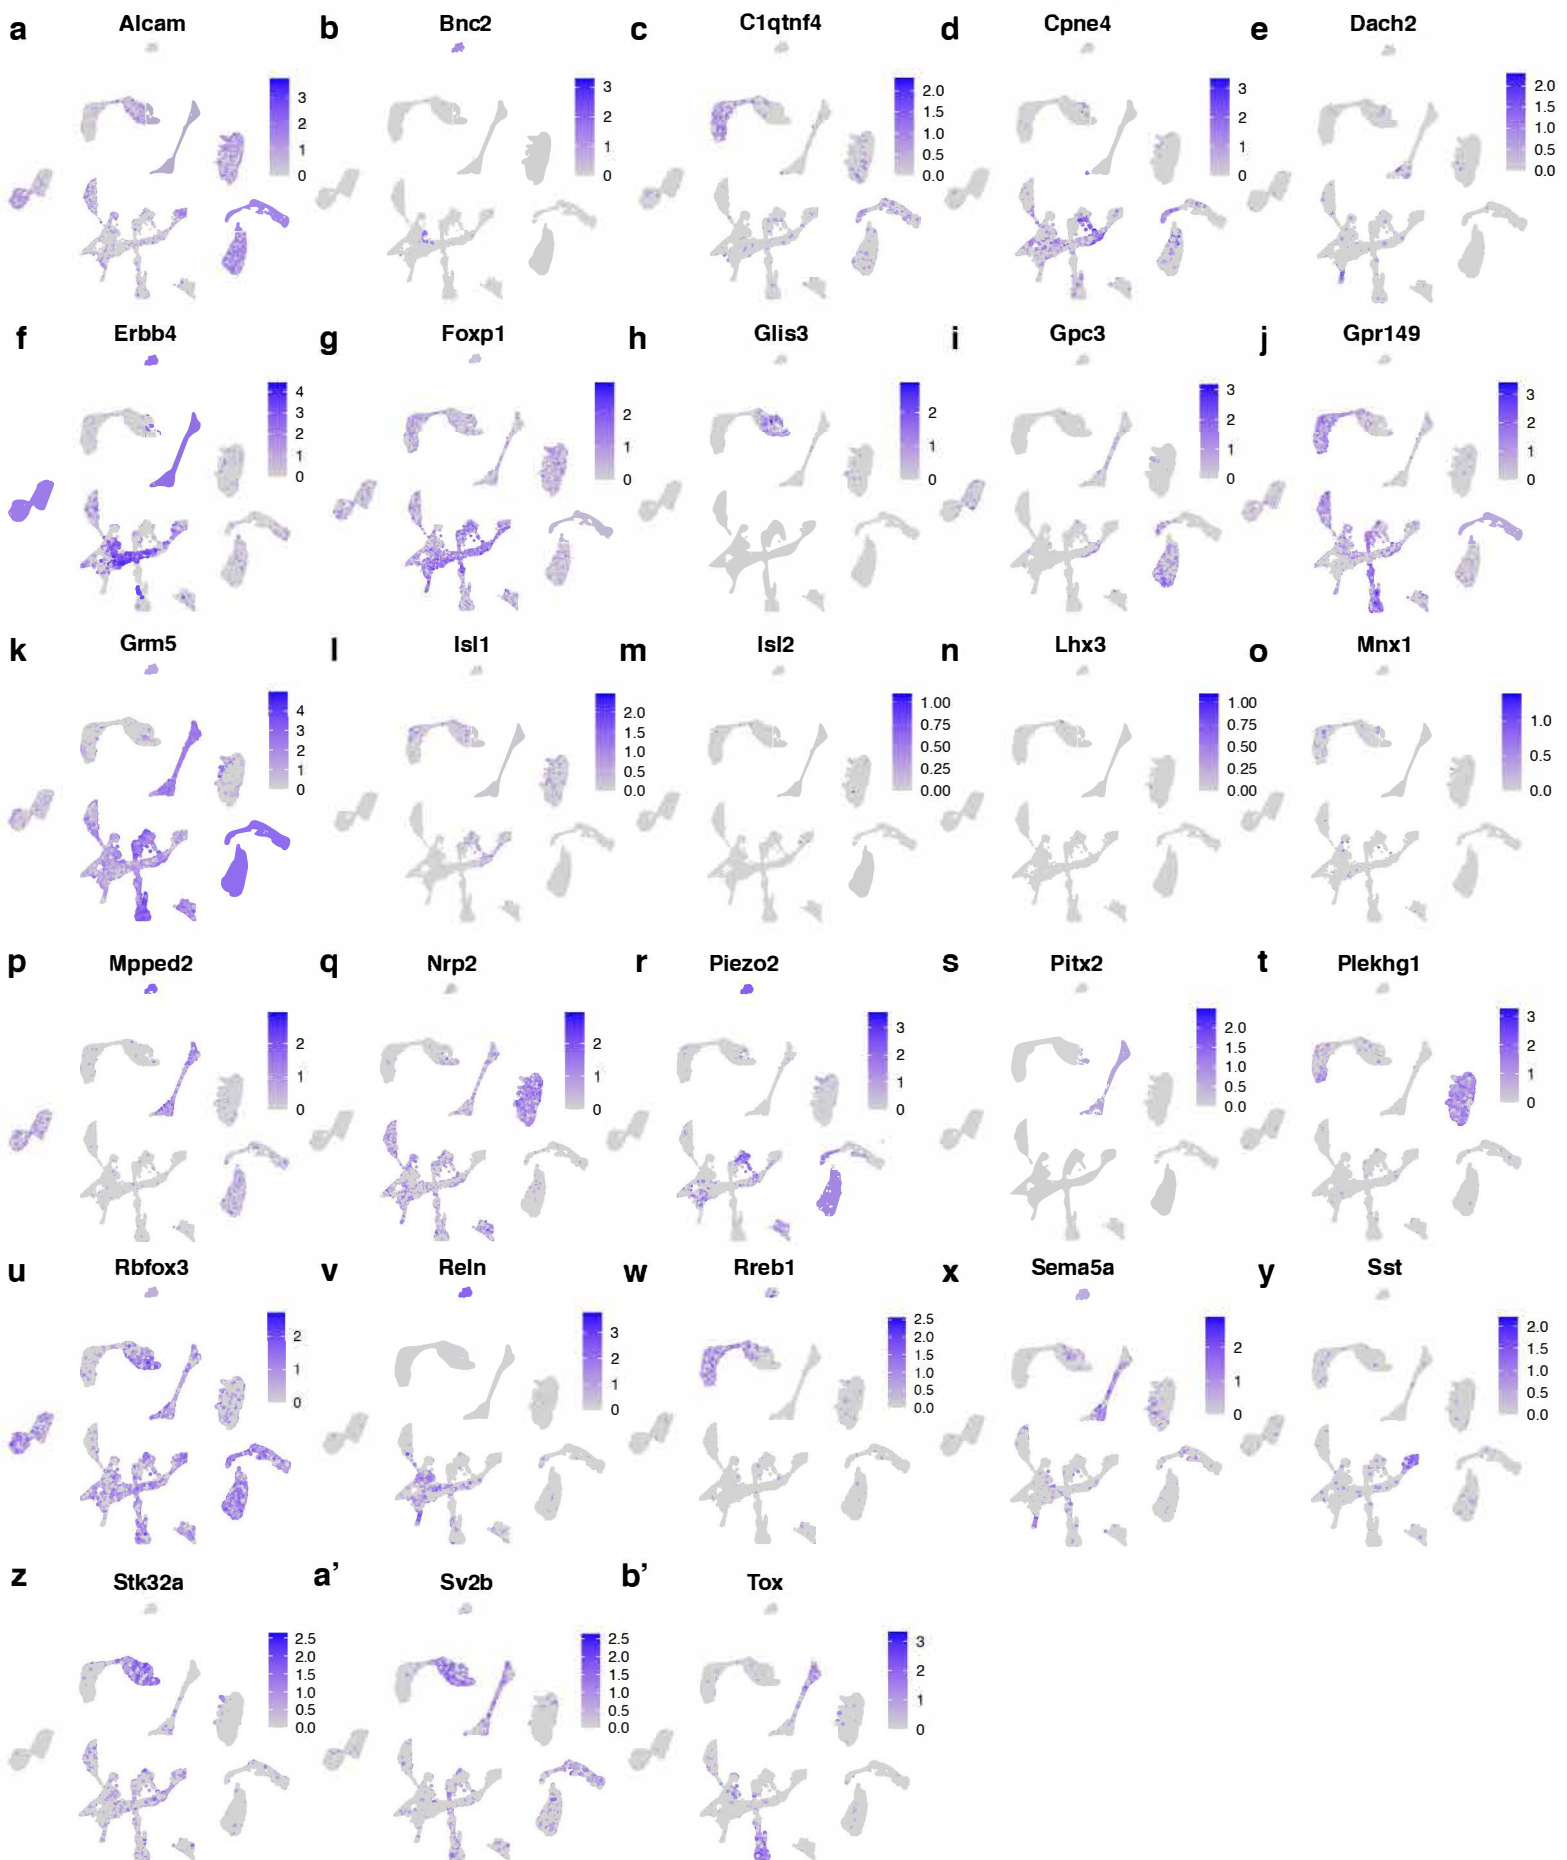



**Supplementary Fig. 14. Nuclear expression across all cholinergic neurons sequenced for genes discussed in our analysis. a-b'**, UMAPs showing expression of genes probed by ISH across all cholinergic nuclei sequenced. Only displaying UMAPs not shown elsewhere. *Alcam, Bnc2, C1qtnf4, Cpne4, Dach2, Erbb4, Foxp1, Glis3, Gpc3, Gpr149, Grm5, Isl1, Isl2, Lhx3, Mnx1, Mpped2, Nrp2, Piezo2, Pitx2, Plekhg1, Rbfox3, Reln, Rreb1, Sema5a, Stk32a, Sst, Sv2b, Tox*.

**Supplementary Table 1. Summary of number of nuclei sequenced in this study**

| <b>All</b>    |              | <b>All cholinergic</b> |              | <b>Skeletal</b> |             | <b>Alpha</b> |             | <b>Interneurons</b> |             | <b>Visceral</b> |             |
|---------------|--------------|------------------------|--------------|-----------------|-------------|--------------|-------------|---------------------|-------------|-----------------|-------------|
| Cluster       | Count        | Cluster                | Count        | Cluster         | Count       | Cluster      | Count       | Cluster             | Count       | Cluster         | Count       |
| 0             | 2321         | I1                     | 1520         | 0               | 917         | 0            | 344         | 0                   | 816         | 0               | 579         |
| 1             | 2243         | I2                     | 780          | 1               | 853         | 1            | 338         | 1                   | 704         | 1               | 559         |
| 2             | 1914         | I3                     | 756          | 2               | 688         | 2            | 183         | 2                   | 617         | 2               | 483         |
| 3             | 1737         | I4                     | 702          | 3               | 635         | 3            | 139         | 3                   | 434         | 3               | 472         |
| 4             | 1598         | I5                     | 584          | 4               | 626         | 4            | 119         | 4                   | 418         | 4               | 468         |
| 5             | 1577         | I6                     | 544          | 5               | 562         | 5            | 78          | 5                   | 417         | 5               | 466         |
| 6             | 1563         | I7                     | 160          | 6               | 276         | 6            | 45          | 6                   | 329         | 6               | 380         |
| 7             | 1513         | I8                     | 329          | 7               | 184         | 7            | 38          | 7                   | 288         | 7               | 369         |
| 8             | 1458         | V1                     | 798          | 8               | 136         |              |             | 8                   | 262         | 8               | 362         |
| 9             | 1304         | V2                     | 771          | 9               | 129         |              |             | 9                   | 259         | 9               | 344         |
| 10            | 1235         | V3                     | 722          | 10              | 48          |              |             | 10                  | 230         | 10              | 330         |
| 11            | 1226         | V4                     | 662          |                 |             |              |             | 11                  | 197         | 11              | 256         |
| 12            | 1213         | V5                     | 618          |                 |             |              |             | 12                  | 164         | 12              | 242         |
| 13            | 1213         | V6                     | 582          |                 |             |              |             | 13                  | 80          | 13              | 190         |
| 14            | 1019         | V7                     | 557          |                 |             |              |             |                     |             | 14              | 78          |
| 15            | 942          | V8                     | 467          |                 |             |              |             |                     |             | 15              | 35          |
| 16            | 929          | V9                     | 247          |                 |             |              |             |                     |             |                 |             |
| 17            | 795          | V10                    | 189          |                 |             |              |             |                     |             |                 |             |
| 18            | 673          | S1                     | 1528         |                 |             |              |             |                     |             |                 |             |
| 19            | 656          | S2                     | 1285         |                 |             |              |             |                     |             |                 |             |
| 20            | 604          | S3                     | 2241         |                 |             |              |             |                     |             |                 |             |
| 21            | 592          |                        |              |                 |             |              |             |                     |             |                 |             |
| 22            | 578          |                        |              |                 |             |              |             |                     |             |                 |             |
| 23            | 550          |                        |              |                 |             |              |             |                     |             |                 |             |
| 24            | 539          |                        |              |                 |             |              |             |                     |             |                 |             |
| 25            | 538          |                        |              |                 |             |              |             |                     |             |                 |             |
| 26            | 532          |                        |              |                 |             |              |             |                     |             |                 |             |
| 27            | 503          |                        |              |                 |             |              |             |                     |             |                 |             |
| 28            | 487          |                        |              |                 |             |              |             |                     |             |                 |             |
| 29            | 484          |                        |              |                 |             |              |             |                     |             |                 |             |
| 30            | 334          |                        |              |                 |             |              |             |                     |             |                 |             |
| 31            | 329          |                        |              |                 |             |              |             |                     |             |                 |             |
| 32            | 270          |                        |              |                 |             |              |             |                     |             |                 |             |
| 33            | 260          |                        |              |                 |             |              |             |                     |             |                 |             |
| 34            | 250          |                        |              |                 |             |              |             |                     |             |                 |             |
| 35            | 102          |                        |              |                 |             |              |             |                     |             |                 |             |
| 36            | 98           |                        |              |                 |             |              |             |                     |             |                 |             |
| 37            | 52           |                        |              |                 |             |              |             |                     |             |                 |             |
| <b>TOTAL:</b> | <b>34231</b> |                        | <b>16042</b> |                 | <b>5054</b> |              | <b>1284</b> |                     | <b>5215</b> |                 | <b>5613</b> |

**Supplementary Table 2. In situ probe and reagent information**

| Designation                                                     | Source or reference       | Identifier         |
|-----------------------------------------------------------------|---------------------------|--------------------|
| RNAscope® Fluorescent Multiplex Detection Reagents              | Advanced Cell Diagnostics | ACD: 320851        |
| RNAscope® 4-Plex Ancillary Kit for Multiplex Fluorescent Kit v2 | Advanced Cell Diagnostics | ACD: 323120        |
| RNAscope® Multiplex Fluorescent Reagent Kit v2                  | Advanced Cell Diagnostics | ACD: 323100        |
| RNAscope® Probe-Mm-Bnc2-C2                                      | Advanced Cell Diagnostics | ACD: 518521        |
| RNAscope® Probe-Mm-C1qtnf4-C3                                   | Advanced Cell Diagnostics | ACD: 892741        |
| RNAscope® Probe-Mm-Chat-C2, C3                                  | Advanced Cell Diagnostics | ACD: 410071        |
| RNAscope® Probe-Mm-Cpne4-C1                                     | Advanced Cell Diagnostics | ACD: 474721        |
| RNAscope® Probe-Mm-Dach2-C1                                     | Advanced Cell Diagnostics | ACD: 839361        |
| RNAscope® Probe-Mm-Erbb4-C3                                     | Advanced Cell Diagnostics | ACD: 318721        |
| RNAscope® Probe-Mm-Fbn2-C1, C2                                  | Advanced Cell Diagnostics | ACD: 313881        |
| RNAscope® Probe-Mm-Glis3-C1                                     | Advanced Cell Diagnostics | ACD: 314161        |
| RNAscope® Probe-Mm-Gpc3-C1                                      | Advanced Cell Diagnostics | ACD: 418541        |
| RNAscope® Probe-Mm-Gpr149-C1                                    | Advanced Cell Diagnostics | ACD: 318071        |
| RNAscope® Probe-Mm-Grm5-C2                                      | Advanced Cell Diagnostics | ACD: 423631        |
| RNAscope® Probe-Mm-Gulp1-C1                                     | Advanced Cell Diagnostics | ACD: 490061        |
| RNAscope® Probe-Mm-Mpped2-C1                                    | Advanced Cell Diagnostics | ACD: 848371        |
| RNAscope® Probe-Mm-Nrp2-C1                                      | Advanced Cell Diagnostics | ACD: 500661        |
| RNAscope® Probe-Mm-Piezo2-C3                                    | Advanced Cell Diagnostics | ACD: 400191        |
| RNAscope® Probe-Mm-Pitx2-C2                                     | Advanced Cell Diagnostics | ACD: 412841        |
| RNAscope® Probe-Mm-Plekhg1-C1, C2                               | Advanced Cell Diagnostics | ACD: 411501        |
| RNAscope® Probe-Mm-Prph-C2, C3                                  | Advanced Cell Diagnostics | ACD: 400361        |
| RNAscope® Probe-Mm-Rbfox3-C1                                    | Advanced Cell Diagnostics | ACD: 313311        |
| RNAscope® Probe-Mm-Reln-C1                                      | Advanced Cell Diagnostics | ACD: 405981        |
| RNAscope® Probe-Mm-Rreb1-C2                                     | Advanced Cell Diagnostics | ACD: 542641        |
| RNAscope® Probe-Mm-Sema5a-C3                                    | Advanced Cell Diagnostics | ACD: 508091        |
| RNAscope® Probe-Mm-Slc6a1-C3                                    | Advanced Cell Diagnostics | ACD: 444071        |
| RNAscope® Probe-Mm-Sst-C2, C3                                   | Advanced Cell Diagnostics | ACD: 404631        |
| RNAscope® Probe-Mm-Stk32a-C4                                    | Advanced Cell Diagnostics | ACD: 509691        |
| RNAscope® Probe-Mm-Sv2b-C3                                      | Advanced Cell Diagnostics | ACD: 479991        |
| RNAscope® Probe-Mm-Tns1-C1, C3                                  | Advanced Cell Diagnostics | ACD: 551411        |
| RNAscope® Probe-Mm-Tox-C1                                       | Advanced Cell Diagnostics | ACD: 484781        |
| RNAscope® Probe-Mm-Zeb2-C2                                      | Advanced Cell Diagnostics | ACD: 436391        |
| Pyranose Oxidase                                                | Sigma-Aldrich             | Sigma: P4234       |
| SSC Buffer, 20X Concentrate                                     | Sigma-Aldrich             | Sigma: SRE0068-1L  |
| RNase Inhibitor, Murine                                         | New England BioLabs       | NEB: M0314L        |
| Opal 520 Reagent Pack                                           | Akoya Biosciences         | Akoya: FP1487001KT |
| Opal 570 Reagent Pack                                           | Akoya Biosciences         | Akoya: FP1488001KT |
| Opal 620 Reagent Pack                                           | Akoya Biosciences         | Akoya: FP1495001KT |
| Opal 690 Reagent Pack                                           | Akoya Biosciences         | Akoya: FP1497001KT |
